1 **Predictive features of gene expression variation reveal a**  
2 **mechanistic link between expression variation and differential**  
3 **expression**

4 Olga M. Sigalova<sup>1</sup>, Amirreza Shaeiri<sup>2</sup>, Mattia Forneris<sup>1</sup>, Eileen E.M. Furlong<sup>1, †</sup>, Judith B  
5 Zaugg<sup>2, †</sup>

6

7 <sup>1</sup>European Molecular Biology Laboratory (EMBL), Genome Biology Unit, D-69117,  
8 Heidelberg, Germany

9 <sup>2</sup> European Molecular Biology Laboratory (EMBL), Structures and Computational  
10 Biology Unit, D-69117, Heidelberg, Germany

11

12

13 †To whom correspondence should be addressed

14 E-mail [furlong@embl.de](mailto:furlong@embl.de); [judith.zaugg@embl.de](mailto:judith.zaugg@embl.de)

15

16

17 **Running title:** Inherent genomic features predict gene expression variation

18

19 **Keywords:** Expression variation, gene expression, transcriptional regulation, promoters,  
20 embryogenesis

## 21 **Abstract**

22 For most biological processes, organisms must respond to extrinsic cues, while maintaining  
23 essential gene expression programs. Although studied extensively in single cells, it is still  
24 unclear how variation is controlled in multicellular organisms. Here, we used a machine-  
25 learning approach to identify genomic features that are predictive of genes with high versus  
26 low variation in their expression across individuals, using bulk data to remove stochastic cell-  
27 to-cell variation. Using embryonic gene expression across 75 *Drosophila* isogenic lines, we  
28 identify features predictive of expression variation, while controlling for expression level.  
29 Genes with low variation fall into two classes, indicating they employ different mechanisms to  
30 maintain a robust expression. In contrast, genes with high variation seem to lack both types of  
31 stabilizing mechanisms. Applying the framework to human tissues from GTEx revealed similar  
32 predictive features, indicating that promoter architecture is an ancient mechanism to control  
33 expression variation. Remarkably, expression variation features could also predict differential  
34 expression upon stress in both *Drosophila* and human. Differential gene expression signatures  
35 may therefore be partially explained by genetically encoded gene-specific features, unrelated  
36 to the studied treatment.

37

## 38 **Introduction**

39 Living systems have a remarkable capacity to give rise to robust and highly reproducible  
40 phenotypes. Perhaps the most striking example of this is the process of embryogenesis, where  
41 fertilized eggs give rise to stereotypic body plans despite segregating genetic variants and  
42 moderate differences in environmental conditions (e.g. water temperature for fish, mothers diet  
43 for humans). This phenomenon led Waddington to propose that developmental reactions are  
44 canalized, which buffers them to withstand such variation without alterations in embryonic  
45 development (Waddington 1942). In agreement with this, variation in gene expression is an  
46 evolvable trait under selection pressure (Lehner 2008; Fraser et al. 2004; Metzger et al. 2015).  
47 Gene expression variation can arise from a multitude of stochastic, environmental and genetic  
48 factors (Eling, Morgan, and Marioni 2019; Raser and O'Shea 2005; Félix and Barkoulas 2015;  
49 S. Huang 2009). For some genes, expression variation is tolerated, without obvious effects on  
50 fitness, or can even be beneficial, for example in stress response or for stochastic cell fate  
51 decisions (Macneil and Walhout 2011; Raj and van Oudenaarden 2008; Blake et al. 2006). In  
52 other cases, variation in gene expression is detrimental and must be tightly regulated, for  
53 example for essential genes (Fraser et al. 2004) and genes that reduce fitness in heterozygous  
54 mutants (Batada and Hurst 2007). This suggests that there are inherent mechanisms that  
55 modulate variation in gene expression, either attenuating or amplifying it (Fig 1a).

56 Over the last decade, studies on single-celled organisms or cell lines have linked multiple  
57 regulatory mechanisms to gene expression variation, including the presence of a TATA-box at  
58 the gene's promoter (Ravarani et al. 2015; Blake et al. 2006), CpG islands (Morgan and  
59 Marioni 2018), bi-valent chromatin marks (Faure, Schmiedel, and Lehner 2017), polymerase  
60 pausing (Boettiger and Levine 2009) or miRNA binding (Schmiedel et al. 2015). However, it

61 remains unclear what mechanisms regulate expression variation in multicellular, developing  
62 organisms in a gene and tissue-specific manner.

63 To address this, we devised a machine learning approach and performed a systematic analysis  
64 of factors underlying variation of gene expression in *Drosophila melanogaster* to uncover the  
65 regulatory mechanisms involved. To measure expression variation, we used gene expression  
66 data generated from a pool of embryos (~100) sampled from 75 different isogenic lines during  
67 embryogenesis (Cannavò et al. 2016). This experimental design cancels out most stochastic  
68 noise (since it's bulk sequencing), tissue-specific expression pattern (since it's whole embryo)  
69 and slight differences in developmental progression (since it's 100 embryos per line). To  
70 dissect the regulatory mechanisms that modulate expression variation (Fig 1a), we collated  
71 over a thousand gene-specific and genomically encoded features and applied a random forest  
72 model to identify the properties that best explain expression variation across individuals. As a  
73 comparison, we also predict median expression level across lines using the same features.

74 Our results show that, overall, increasing regulatory complexity translates into more robust  
75 gene expression. We identified two independent mechanisms associated with low expression  
76 variation across individual: Low variable genes either have (i) a broad transcription initiation  
77 region (broad promoters) with high transcription factor (TF) occupancy, or (ii) narrow  
78 initiation regions (narrow promoters) with Polymerase II (PolII) pausing and high regulatory  
79 complexity outside the promoter region. In contrast, genes with high variability generally have  
80 narrow promoters, and little other regulatory features, suggesting that it may rather be a lack  
81 of 'stabilizing' mechanisms that facilitates their noisy expression. Applying the same  
82 framework to human data derived from tissues across individuals (GTEx Consortium 2013)  
83 identified similar promoter-associated features to be predictive of expression variation, thus  
84 validating our findings in an independent organism. Remarkably, these same features are also  
85 predictive of differentially expressed genes when tested on independent datasets from adult

86 *Drosophila* subjected to different stress conditions, or in a collection of differential expression  
87 data for human. These findings suggest that the differential expression response may be  
88 partially explained by genetically encoded gene-specific features that are unrelated to the  
89 treatment applied.

90 Taken together, our results suggest that gene expression variation across genetically diverse  
91 multicellular organisms is strongly linked to how the gene is regulated and likely reflects  
92 evolutionary constraints on expression precision.

## 93 **Results**

### 94 *Measuring gene expression variation across individuals*

95 To understand the mechanisms by which gene expression variation is controlled during  
96 embryonic development, we obtained RNA-seq data from 75 isogenic lines of *Drosophila*  
97 *melanogaster* embryos at three different developmental stages (2-4, 6-8, and 10-12 hours post  
98 fertilization) from (Cannavò et al. 2016). To reduce potential confounding effects of maternally  
99 deposited RNA, we focused on the late embryonic time-point (10-12 hours after fertilization),  
100 and removed genes whose expression decreased between 2-4 h and 10-12h, resulting in  
101 embryonic expression data for 4074 genes (Methods, Supplementary Fig 1). For each gene, we  
102 calculated its median expression level and the coefficient of variation (CV) from the  
103 normalized read counts across individuals (Methods). As variation is highly correlated with the  
104 levels of gene expression (Anders and Huber 2010; Ran and Daye 2017; Eling et al. 2018) we  
105 used the residuals from a locally weighed regression (LOESS) of the CV on median expression  
106 to obtain a measure of expression variation that is relative to the expected variation at a given  
107 expression level (Fig. 1b).

108 We confirmed that this measure of variation is highly correlated with alternative metrics, such  
109 as variance stabilized standard deviation or residual median absolute deviation (Supplementary  
110 Fig. 2a-b) and robust with respect to the number and identity of samples used (Fig. 1c).  
111 Moreover, using the full dataset from Cannavò (Cannavò et al. 2016), expression variation  
112 values were highly correlated across time, especially for consecutive time-points, further  
113 confirming the approach (Methods, Supplementary Fig.1d). Finally, we observed a strong  
114 correlation in expression variation between pairs of genes in close proximity (Supplementary  
115 Fig. 1e), as previously observed for neighbouring genes in yeast (Becskei, Kaufmann, and van  
116 Oudenaarden 2005; Batada and Hurst 2007).

117 As these 75 samples came from strains with different genotypes, we first calculated the  
118 proportion of expression variance that is explained by genetics in *cis* (taking variants within 50  
119 kb of each gene into account) using variance decomposition (Methods). On average, 6%  
120 (median across all genes) of the total gene expression variation was explained by *cis* genetics  
121 (Supplementary Fig. 1f), indicating that more complex genetic effects and other properties must  
122 account for the majority of expression variation. We reasoned that differences in the extent of  
123 expression variation among genes should reflect inherent differences in their regulation,  
124 including their regulatory complexity and mechanisms of noise buffering or amplification.  
125 Therefore, in the remainder of this study we investigate the regulatory differences between  
126 genes with high versus low expression variation.

127

### 128 ***Genomic features predict expression variation independent of expression levels***

129 To understand the drivers of expression variation, we collected 1,888 gene-specific features  
130 (Table 1, Supplementary tables 1-3) and used random forest regression to identify those that  
131 are associated with either expression variation or expression level (Fig 1d). This allowed us to  
132 distinguish between features that are predictive of one or both properties. The features can be  
133 broadly divided into seven categories: transcription start site (TSS; e.g. core promoter motifs,  
134 chromatin accessibility, TF binding), gene body features (e.g. gene length, number of exons),  
135 3'untranslated regions (UTR; e.g. length, miRNA motifs), distal regulatory elements (e.g. TSS-  
136 distal chromatin accessibility, TF occupancy), gene type (e.g. housekeeping genes, TFs), gene  
137 context (e.g. gene density, distance to the borders of topologically associated domains (TADs)),  
138 and genetics (e.g. the presence of eQTL and a *cis* genetic component; full description in  
139 Methods and Table 1).

140 To restrict our analysis to the important features, we applied the random forest-based Boruta  
141 algorithm, which iteratively selects all features that predict better than their permuted version  
142 (Kursa and Rudnicki 2010). This resulted in 93 and 106 predictive features for expression  
143 variation and level, respectively (Fig. 1d). Using these feature sets, our models predicted  
144 expression variation and level with an  $R^2$  of 0.45 and 0.43 (5-fold cross validation),  
145 respectively, while permuting the labels resulted an  $R^2$  of zero (Fig. 1d).

146 To ensure the robustness of our predictions we have performed a number of analyses: first, we  
147 verified that the predictions for variation are independent of the level of gene expression by  
148 showing that the models performed equally well on genes grouped into quartiles based on their  
149 expression levels (Fig. 1e). Second, we ensured that the predictions are robust to the choice of  
150 measure used for expression variation (Supplementary Fig. 2c). Third, we tested whether  
151 dynamic gene expression changes during developmental stages can contribute to the variation  
152 predictions. We reran the random forest models, predicting expression variation for genes  
153 grouped based on their absolute expression change between 6-8 and 10-12 hours after  
154 fertilization. For genes with minor expression change between the two time-points (below  
155 median of 0.8), the performance was comparable to the full model, while for the genes with a  
156 stronger expression change (above 0.8) the  $R^2$  dropped to about 0.3 (Supplementary Fig. 2d).  
157 This indicates that some portion of expression variation comes from dynamic changes in gene  
158 expression during embryogenesis, which is not captured by our features (and thus reduces the  
159 performance of our model for this set of genes). However, since the performance is the best for  
160 genes that vary little between stages, it indicates that variance explained by our model is overall  
161 not majorly confounded by expression dynamics. Finally, the model performance does not  
162 decrease when training and test sets come from different chromosomes (Supplementary Fig.  
163 2e), demonstrating that the results are not confounded by shared regulatory features between  
164 neighboring genes.



165 Taken together, these results establish that gene expression variation - as well as gene  
 166 expression levels - can be predicted based on genomically encoded features, when measured  
 167 across a population of genetically diverse individuals during embryogenesis. The predictions  
 168 are independent of the gene's expression level and are robust to the metric used for measuring  
 169 variation. These models can therefore be used as the basis for addressing questions about  
 170 buffering mechanisms that regulate gene expression variation during embryogenesis.

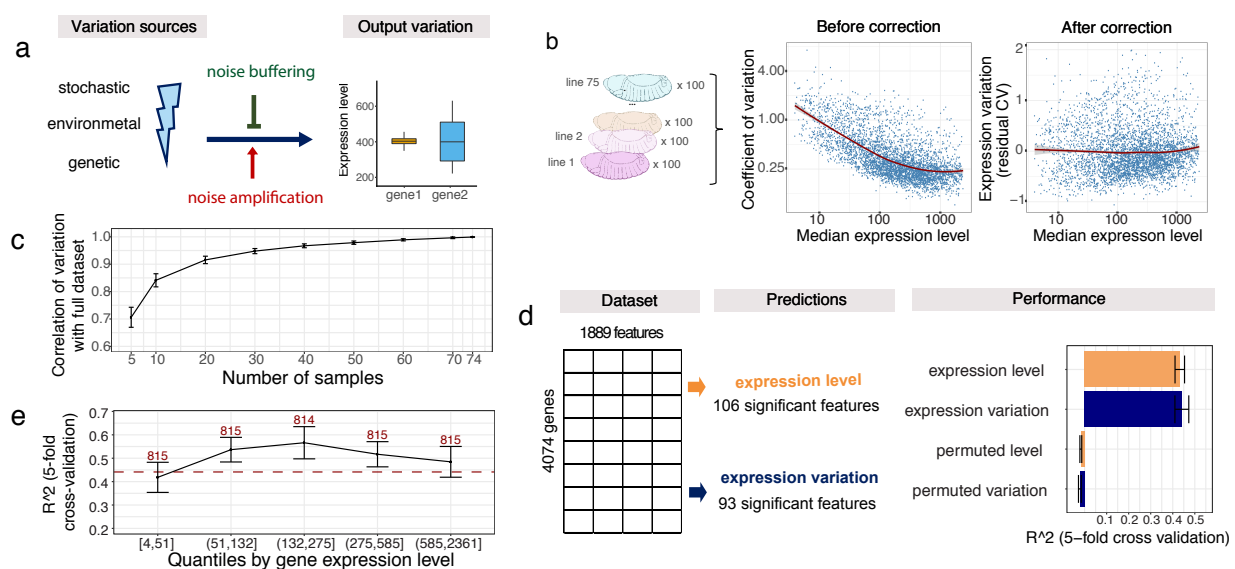

171 **Figure 1. Genomic features can predict expression variation independent of expression**  
 172 **levels. (A)** Differences of gene regulatory mechanisms related to noise amplification and noise  
 173 buffering would result in different observed expression variation given the same variation  
 174 sources (left). **(B)** Dependence between coefficient of variation (CV) and median expression  
 175 level of 4074 genes across 75 samples (left). Residuals from LOESS regression of CV on the  
 176 median were used as the measure of variation throughout the analysis (right). Median  
 177 expression level and coefficient of variation plotted on log<sub>2</sub>-scale, red line represents LOESS  
 178 regression fit. **(C)** Correlation of expression variation calculated from subsets of samples  
 179 versus the full data set. Error bars = standard deviation across 100 independent selections of  
 180 samples. **(D)** Schematic overview of the random forest models and feature selection with  
 181 Boruta algorithm (left). Performance shown as R<sup>2</sup> from 5-fold cross-validation and compared  
 182 to randomly permuted data (right). Whiskers = standard deviation across the 5-fold cross  
 183 validation. **(E)** Performance (R<sup>2</sup>, 5-fold cross validation) for genes grouped by expression  
 184 levels (quantiles). Whiskers represent standard deviation from 5-fold cross validation, number  
 185 of genes per quantile indicated (x-axis). Red dotted line indicates performance of full model.

186

187

188 ***Promoter architecture is the most important predictor of expression variation***

189 Next, we used this predictive framework to investigate the genomic features that best explain  
190 expression variation and expression level. We retrieved the features' 'importance score' from  
191 the Boruta algorithm and determined the correlation of each feature with both expression  
192 properties (Supplementary Table 4). Although most features are to some extent predictive of  
193 both expression level and variation, their relative importance differed substantially (Fig. 2a).  
194 Being a housekeeping gene, for example, was strongly predictive of high expression level  
195 while being less important for expression variation. Conversely, the presence of a core  
196 promoter TATA-box motif is strongly predictive of high expression variation only (Fig. 2a,  
197 see Suppl. Table 4 for full list). We note that most features are either associated with higher  
198 variation and lower expression or vice versa, suggesting that expression level and variation are  
199 not completely independent, as was previously observed (Faure, Schmiedel, and Lehner 2017),  
200 even though they are globally uncorrelated (Fig 1b). However, we found that when we split  
201 genes into the categories of the top features (e.g. housekeeping vs non-housekeeping) the  
202 differences in expression variation are pronounced at all expression levels (Fig 2b-e): For  
203 example, housekeeping genes (the strongest predictor for expression level) are less variable  
204 than non-housekeeping genes at any level of expression (Fig 2b). The same holds true for the  
205 feature 'promoter shape index', which is the strongest predictor for variation (Fig 2c), as well  
206 as other features such as '#conditions with DHS' (DNase hypersensitive sites) (Fig 2d) and  
207 'presence of a TATA box' (Fig 2e). This demonstrates that the features explain expression  
208 variation independent of expression level.

209 Promoter-associated features (*TSS-proximal*) are among the strongest predictors in terms of  
210 explanatory power for expression variation, and include promoter shape, core promoter motifs  
211 and GC-content, Pol II pausing, chromatin accessibility, and TF occupancy at TSS (Fig. 2a).  
212 Consequently, a model based only on TSS-proximal features can predict expression variation

213 fairly well with  $R^2=0.37$ , while performing less well for predicting expression level ( $R^2= 0.29$ )  
214 (Fig. 2f). Although lower than the model using all features ( $R^2$  of variation/level 0.45/0.43),  
215 this is markedly higher than a model on any other feature type alone. The next most predictive  
216 class of features for variation are *gene body* ( $R^2$  0.27/0.14) and *gene type* (0.20/0.25) (although  
217 more predictive of expression level), followed by *gene context* (0.16/0.10). *3'UTR* features,  
218 which rank third among the most predictive features of expression levels, show little predictive  
219 value for variation (0.06/0.16), and distal features overall showed a rather weak predictive  
220 value for both variation and level (0.06/0.01). Finally, *Genetics* was the least predictive for  
221 both variation and level among the seven feature groups (0.03/0.05), in keeping with the  
222 variance decomposition analysis above.

223 In summary, our results demonstrate that multiple regulatory features can independently  
224 predict gene expression variation or gene expression levels. Interestingly, promoter features,  
225 rather than upstream regulatory complexity (such as distal DHS sites), are the most predictive  
226 of expression variation. Given that housekeeping genes and TFs tend to have different promoter  
227 types (Arnold et al. 2016; Haberle and Stark 2018; Lenhard, Sandelin, and Carninci 2012), this  
228 suggests that specific biological functions may have distinct mechanisms to reduce variation  
229 and provide robustness to their expression as evidenced by models based solely on a gene's  
230 functional annotation (*Gene type* in Fig. 2f).

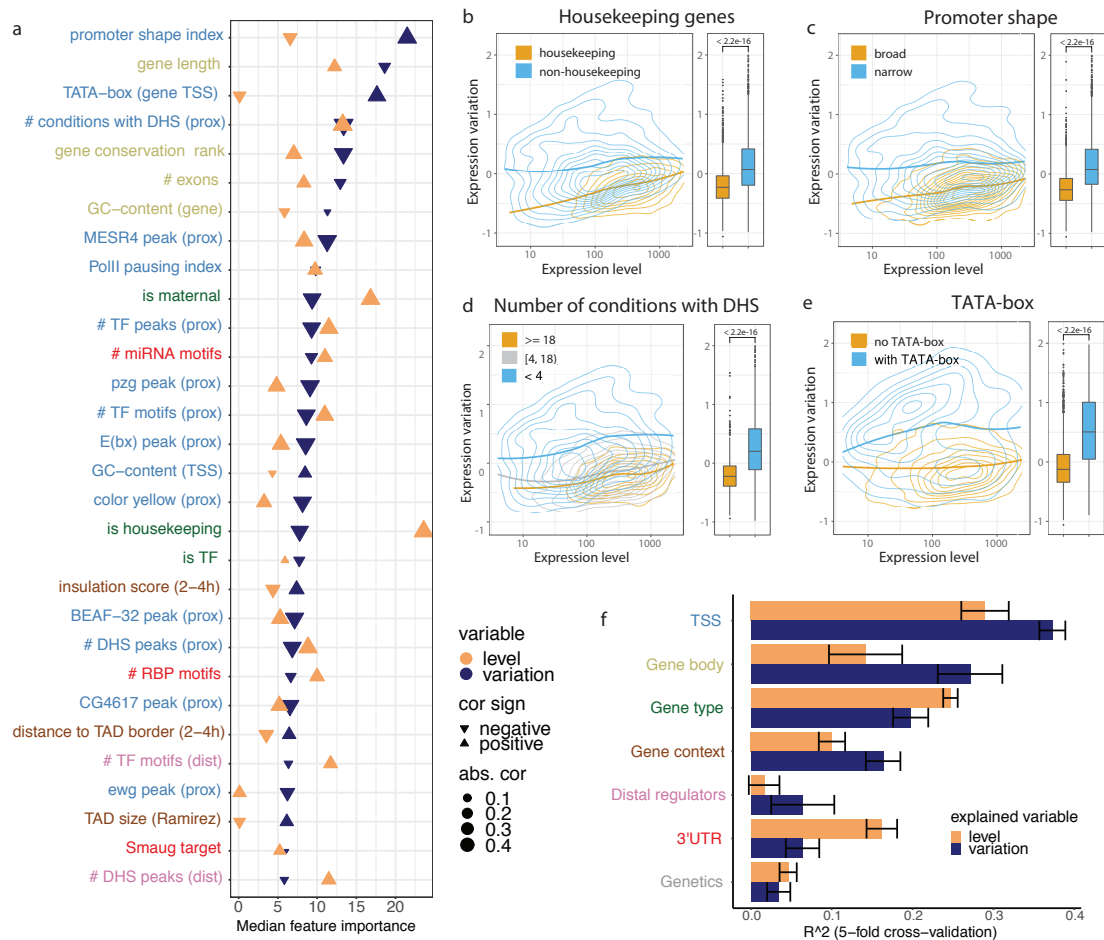

231

232 **Figure 2. Promoter architecture is the most important predictor of expression variation**  
 233 **(A)** Top-30 important features for predicting expression variation using Boruta feature  
 234 selection. Features are ordered by their importance for expression variation (blue) and show  
 235 the corresponding importance for level (orange). The absolute value and sign of correlation  
 236 coefficient is indicated by the triangle size and orientation, respectively. For binary features,  
 237 phi coefficient of correlation was used, otherwise Spearman coefficient of correlation. Label  
 238 colors correspond to feature groups in (F). **(B-E)** Relationship between expression level and  
 239 expression variation shown as 2D kernel density contours (left) and boxplots (right) for  
 240 housekeeping genes **(B)**, genes separated by promoter shape **(C)**, number of embryonic  
 241 conditions with a DHS **(D)**, and presence of TATA-box at TSS **(E)**. LOESS regression lines  
 242 indicated for each gene group, P-values from Wilcoxon test. **(F)** Performance of random forest  
 243 predictions (mean  $R^2$  from 5-fold cross-validation) for expression level (orange) and variation  
 244 (blue) trained on individual feature groups. Whiskers = standard deviation, color code of y-  
 245 axis labels matches Fig 2A.

246 *Expression variation in broad versus narrow promoter genes reflects trade-off between*  
247 *expression robustness and plasticity*

248 The most prominent predictive feature for expression variation is promoter shape index (Fig  
249 2a), which classifies promoters based on the broadness of their transcriptional initiation region  
250 (Schor et al. 2017; Rach et al. 2009; Forrest et al. 2014; Lenhard, Sandelin, and Carninci 2012).  
251 Genes with narrow promoters generally have higher variation compared to genes with broad  
252 promoters (Fig. 2c), and, interestingly, also comprise a wider range of variation (Fig 3a).  
253 Moreover, expression variation of narrow promoter genes is better explained by genomically  
254 encoded features compared to broad promoter genes ( $R^2= 0.37$  vs  $0.14$ ), and this difference in  
255 performance becomes more pronounced with more stringently defined narrow and broad  
256 promoter genes (Fig. 3b).

257 Interestingly, when we group genes from the two promoter classes into quartiles based on their  
258 variation we find very specific functions enriched among them: the broad class is strongly  
259 enriched for housekeeping genes (Fishers's test odds ratio,  $OR=15.0$ ,  $p\text{-value}<1e-16$ ,  
260 Supplementary table 5) and GO terms related to basic cellular processes (cellular transport,  
261 secretion, and DNA/RNA biogenesis) with the exception of the top 25% most variable genes  
262 within the group being also enriched in metabolic processes (Fig. 3c, Supplementary Fig. 3a,  
263 Supplementary Table 6). In contrast, narrow promoters genes fall into two functional categories  
264 depending on their expression variation: the bottom 50% were enriched in TFs ( $OR=3.0$ ,  $p\text{-}$   
265  $value<1e-16$ ) and GO terms related to development, signaling and regulation of transcription,  
266 while the top 50% are enriched for TATA-box genes ( $OR=7.9$ ,  $p\text{-value}<1e-16$ ) and GO terms  
267 related to metabolism, stress response, and cuticle development (Fig. 3c, Supplementary Fig.  
268 3a). We therefore grouped genes along the dimensions of promoter shape and expression  
269 variation into three classes (Fig. 3a): genes with broad promoters and low levels of variation in  
270 expression (broad), genes with narrow promoters and low expression variation (narrow-low)

271 and genes with narrow promoters and high expression variation (narrow-high).

272 Next we looked at regulatory plasticity of these classes of genes defined here as the variation  
273 in accessibility of TSS-proximal DHSs across time and tissues, see [Reddington et al,  
274 submitted]. We observed that narrow promoter genes had high regulatory plasticity regardless  
275 of their expression variation (Supplementary Fig. 3b). In particular, narrow-low genes are  
276 robustly expressed across individuals at the given developmental stage, while having  
277 condition-specific regulation. In contrast, broad promoter genes are characterized by both low  
278 expression variation and low plasticity, which agrees with their housekeeping functions.

279 Enrichment of low-variable genes in either housekeeping (*broad*) or developmental (*narrow-*  
280 *low*) functions suggests selection pressure may act on those genes to reduce expression noise  
281 in genes essential for viability and development. One proxy for evolutionary constraints is  
282 sequence conservation across long evolutionary distances. In keeping with this, sequence  
283 conservation between *Drosophila* and human was among the top five most predictive features  
284 of low expression variation with conserved genes being significantly less variable (Fig 2a,  
285 Wilcoxon test p-value  $<2e-16$ ). Promoter shape is also correlated with gene conservation:  
286 conserved genes are highly enriched for broad promoters (80% in broad vs. 41% in narrow)  
287 and more enriched in the narrow-low compared to narrow-high class (54% vs 28%). Within  
288 each class, conserved genes are less variable (Supplementary Fig.3c), hence sequence  
289 conservation provides additional information about variation constraints across genes.

290 Overall, these results suggest that expression variation is an orthogonal component to the  
291 regulatory plasticity, which has previously been defined along the narrow-broad promoter  
292 spectrum (Rach et al. 2009; Lenhard, Sandelin, and Carninci 2012). Promoter shape likely  
293 reflects differences in regulatory plasticity (constitutive vs. condition-specific genes), while  
294 expression variation may reflect evolutionary constraints on expression robustness with  
295 essential and highly conserved genes being less variable. These findings indicate a partial

296 uncoupling between expression variation across multicellular individuals in a controlled  
 297 environment and variation across tissues/development, analogous to the uncoupling between  
 298 plasticity and noise observed in yeast (Lehner 2010), and suggest different mechanisms to  
 299 control expression robustness for genes with ubiquitous versus condition-specific expression.

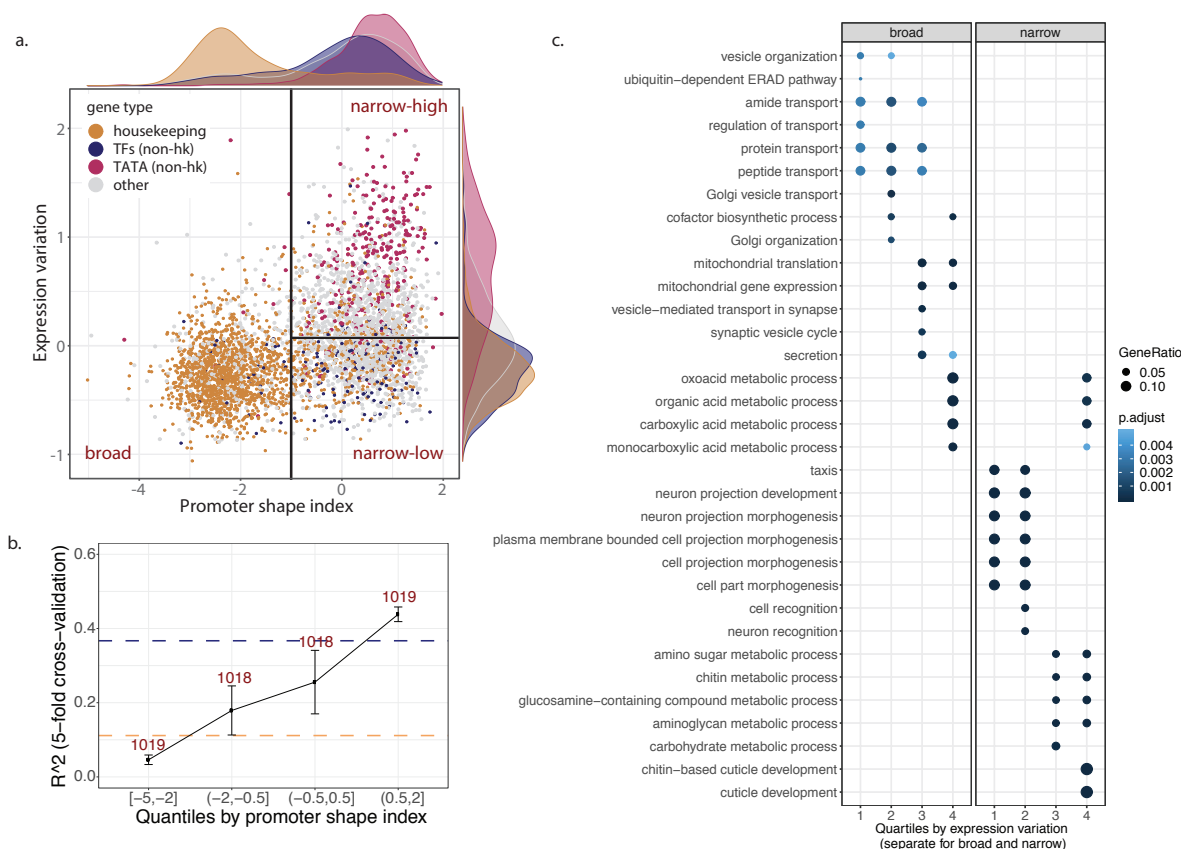

300

301 **Figure 3. Expression variation in broad versus narrow promoter genes reflects trade-offs**  
 302 **between expression robustness and regulatory plasticity. (A)** Genes separate into three  
 303 groups based on their promoter shape index (x-axis) and expression variation (y-axis). Each  
 304 dot represents a gene; colors indicate gene annotations: housekeeping (orange), non-  
 305 housekeeping TFs (blue), non-housekeeping with a TATA-box (red), other (grey).  
 306 Distributions of promoter shape index and expression variation across gene groups are shown  
 307 as density plots. Broad and narrow promoter genes are separated based on shape index  
 308 threshold of -1 (vertical black line) as in (Schor et al. 2017). Narrow-low and narrow-high  
 309 groups are separated based on the median expression variation of narrow promoter genes  
 310 (horizontal black line). **(B)** Performance to predict expression variation for genes split by  
 311 quartiles of promoter shape index. Horizontal lines show performance (mean  $R^2$  from 5-fold  
 312 cross-validation) on broad (orange) and narrow (blue) promoter genes separately. Whiskers =  
 313 standard deviation (from 5-fold cross validation), number of genes per categories indicated (x-  
 314 axis). **(C)** GO term enrichment (Biological Process) of genes stratified by promoter shape and  
 315 expression variation. Top GO terms are shown (full list in Supplementary Table 6. Quartiles  
 316 of expression variation (1- lowest, 4 – highest) were calculated for broad and narrow promoter



317 genes separately. Quantile intervals for broad and narrow promoter genes provided in methods.  
318

### 319 ***Two classes of genes with low variation have distinct regulatory mechanisms***

320 The results above indicate that the partial uncoupling of expression variation and expression  
321 plasticity could be achieved by distinct mechanisms of ensuring expression robustness between  
322 different promoter architectures (broad/narrow). To explore this, we examined the most  
323 predictive features in relation to the different promoter types. Among the most significant  
324 promoter features is “#conditions with DHS” (Fig 2a), which is derived from a comprehensive  
325 tissue and embryonic stage specific atlas of open chromatin regions (DHS data for 19  
326 conditions) during a time-course of *Drosophila* embryogenesis (Reddington et al, submitted).  
327 The median number of developmental conditions in which a gene had at least one DHS site  
328 was 18, 8, and 1 for broad, narrow-low, and narrow-high genes respectively (Fig 4a), thus  
329 highlighting again that the narrow-low and broad classes differ in their developmental plasticity  
330 (Fig. 4a). A similar trend was observed for related features, such as using a compendium of TF  
331 occupancy data during embryogenesis (Fig 4b), TF peaks with motifs, or motifs alone  
332 (Supplementary Fig.4a-b). To understand how these promoter-type specific DHS patterns are  
333 set-up we next examined the 24 TFs that were predictive of expression variation in the full  
334 model (Supplementary Table 4, ‘*med\_imp\_var*’ column). Broad promoter genes were  
335 generally strongly enriched for ubiquitously expressed TFs, insulator proteins and chromatin  
336 remodelers (e.g. BEAF-32, MESR4, E(bx); Fig 4c, Supplementary table 5; Fishers exact test).  
337 The narrow-low class was enriched for the Polycomb-associated developmental factors Trl and  
338 Jarid2, while the narrow-high were not strongly enriched for any TF (Fig. 4c). Interestingly,  
339 some of the TFs enriched in broad vs narrow promoters, are still predictive of expression  
340 variation in the narrow-promoter only model (e.g. MESR4, E(bx), and YL-1, Supplementary  
341 Fig.4c), while the presence of ‘narrow’ TFs, despite being associated with low variation in



342 narrow promoters, had the opposite effect in the broad class (Fig. 4c bottom right).

343 The next most predictive feature in our model is “PolII pausing index” (Fig 2a), defined as the  
344 density of polymerases in the promoter region divided by the gene body length (Saunders et al.  
345 2013)(Fig 2a). Narrow-low genes have the highest pausing index (40) followed by broad and  
346 narrow-high genes (10 and 7, respectively; Supplementary Fig.4d). Consequently, Pol II  
347 pausing is strongly negatively correlated with expression variation in narrow promoters  
348 (Spearman correlation  $Rho=-0.28$ ,  $p\text{-value}<1e-16$ ), yet showed no significant relationship in  
349 broad (Fig. 4d), again highlighting different mechanisms to confer robust expression. This may  
350 be partially explained by Trl, which can modulate the level of Pol II pausing (Tsai et al. 2016).

351 Among the most significant non-promoter features, our model identified distal regulatory  
352 complexity (“#TF motifs (dist)” and “#DHS peaks (dist)” in Fig 2a) and post-transcriptional  
353 events (“#miRNA motifs” and “#RBP motifs” in Fig 2a) as predictive of expression variation.

354 As for the distal regulatory complexity, narrow-low had the highest number (median of 6) of  
355 distal regulatory elements, defined as DHS within 10kb of the TSS, followed by broad (4) and  
356 narrow-high (4) genes (Supplementary Fig.4g). Consequently, the number of distal DHS is  
357 negatively correlated with expression variation in narrow promoters ( $Rho=-0.22$ ,  $p\text{-value}<1e-$   
358  $16$ ) while being uncoupled from variation for broad (Fig. 4f). Similarly, narrow-low genes have  
359 a higher number of miRNA motifs in their 3’UTRs (median of 35) compared to broad (20) and  
360 narrow-high (14) genes (Supplementary Fig.4e), which again was negatively correlated with  
361 variation in narrow promoter genes only ( $Rho=-0.31$ ,  $p\text{-value}<1e-16$ ) (Fig. 4e). Similar results  
362 were obtained for the number of RNA-binding protein (RBP) motifs, which have an effect for  
363 narrow, but not for broad, genes (Supplementary fig. 4f).

364 In summary, these findings provide strong evidence that robustness in gene expression across  
365 individuals is conveyed by different mechanisms depending on the gene’s promoter type: in  
366 broad promoter genes, robust expression is likely a result of a plethora of broadly expressed

367 TFs that bind to the core promoter and keep the chromatin constitutively accessible, compatible  
368 with their house-keeping roles. Narrow promoter genes, in contrast, seem to be regulated by a  
369 smaller number of (narrow-specific) TFs and their robustness is conveyed through mechanisms  
370 that involve Pol II pausing, distal regulatory elements, and posttranscriptional regulation. This  
371 suggests that broad and narrow promoter types have distinct mechanisms to regulate expression  
372 variation that are not necessarily transferable. This is possibly related to the relatively higher  
373 regulatory plasticity required of the narrow-low genes.

374 Partial aspects of these findings have been reported previously. E.g. In a study of 14  
375 developmental control genes, Pol II pausing at promoters was linked to more synchronous gene  
376 activation, thereby reducing cell-to-cell variability in the activation of gene expression  
377 (Boettiger and Levine 2009). Also, miRNAs have been proposed to buffer expression noise  
378 (Schmiedel et al. 2018, 2015). Our data puts these previous findings in a more global context  
379 as part of a distinct mechanism for a particular promoter type.

380 We summarized these mechanisms as two indices based on the ranked averages of the  
381 corresponding features: *broad regulatory index* (number of TF peaks, motifs and conditions  
382 with DHS, at the TSS) and *narrow regulatory index* (Pol II pausing index, number of distal  
383 DHS and miRNA motifs), respectively (Fig 4g), which nicely separate the three gene groups.  
384 Interestingly, we found no evidence for a specific noise-amplifying factor, except for the  
385 TATA-box. Yet, even for TATA-box genes, since they are depleted of all the aforementioned  
386 robustness features (Supplementary Fig. 4h), the observed high variation may result from a  
387 lack of robustness-conveying factors.

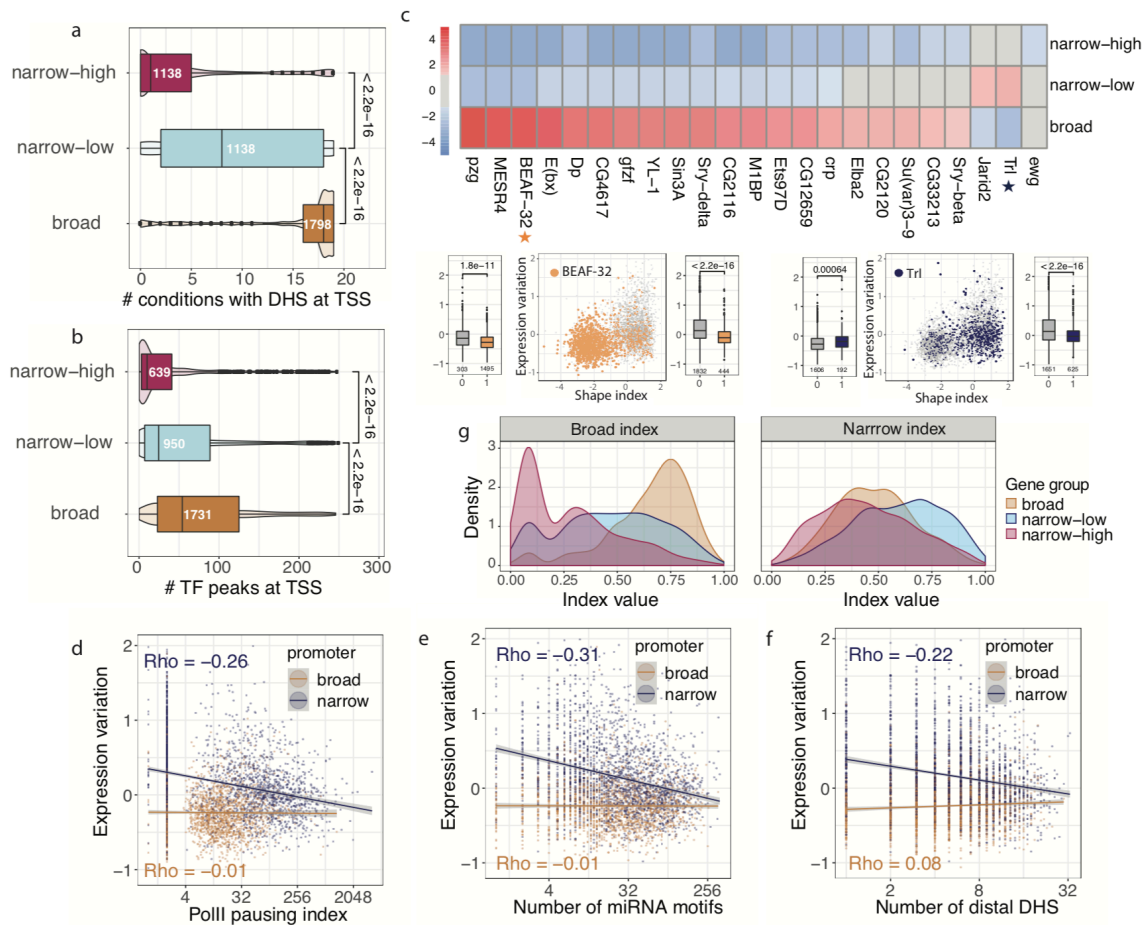

388

389 **Figure 4. Different regulatory mechanisms lead to expression robustness in genes with**  
 390 **broad and narrow promoters. (A,B)** Chromatin accessibility (number of conditions with  
 391 DHS) (A), or number of different TF peaks (B) overlapping TSS-proximal DHS for genes  
 392 stratified into broad, narrow-low and narrow-high (defined in Fig 3A). P-values from Wilcoxon  
 393 test. (C) Top: enrichment (odds ratio from Fisher's test) of ChIP peaks for 24 TFs in TSS-  
 394 proximal DHSs of broad, narrow-low and narrow-high genes. Only TFs with predictive  
 395 importance for expression variation (based on Boruta) were included. For each TF, Fisher's  
 396 test was performed separately for each category vs all other. Color = log<sub>2</sub> odds ratio from  
 397 Fisher's exact test (two-sided), grey = non-significant comparisons (adjusted p-value cutoff of  
 398 0.01, Benjamini-Hochberg correction on all 24x3 comparisons). Lower panels: Presence of  
 399 BEAF-32 (left) and Trl (right) ChIP-seq peaks in TSS-proximal DHS, plotted coordinates of  
 400 promoter shape index and expression variation (same as Fig. 3a). Each dot represents a gene  
 401 (grey if TF peak is absent, blue for Trl, orange for BEAF-32). (D-F) Relationship between  
 402 polymerase pausing index (D), number of miRNA motifs in 3'UTR of a gene (E) and number  
 403 of TSS-distal DHS peaks (F) and expression variation for broad (orange) and narrow (blue)  
 404 promoter genes. Each dot represents a gene, lines linear regression fits, rho=Spearman  
 405 correlation coefficient. (G) Gene scores by two indices constructed as the normalized rank  
 406 average of: number of embryonic conditions with DHS, number of TF peaks, number of TF  
 407 motifs (Broad regulatory index; left), and number of TSS-distal DHS, number of miRNA  
 408 motifs, Pol II pausing index (Narrow regulatory index; right). Colors correspond to broad  
 409 (orange), narrow-low (blue) and narrow-high (red)) gene groups. P-values < 1e-09 for all  
 410 pairwise comparisons of the distributions.

411 ***Expression variation can predict signatures of differential expression upon stress***

412 So far, we showed that distinct mechanisms regulating expression variation are directly  
413 encoded in the genome. In the following, we want to assess the impact of these findings for  
414 interpreting gene expression studies in general.

415 We postulate that the expression variation of a gene across individuals can be interpreted as its  
416 ability to be modulated by any random perturbation. If this is true, we expect expression  
417 variation to be predictive of a gene's response to changes in the environment. To test this, we  
418 used an independent gene expression dataset from adult flies that were subjected to different  
419 stress conditions related to temperature, starvation, radiation, and fungi infection (Moskalev et  
420 al. 2015). In agreement with our postulation we find that genes differentially expressed upon  
421 stress have high expression variation in our embryonic dataset (Fig. 5a, Wilcoxon test p-  
422 value $<1e-16$ ). Remarkably, this held true for every individual stress condition (Supplementary  
423 Fig. 5a).

424 Differentially expressed genes are enriched for narrow-high promoter genes (Fishers's test  
425 odds ratio=2.97, p  $<1e-16$ ). Consequently, they are associated with lower chromatin  
426 accessibility (p  $<1e-16$ , Supplementary Fig. 5b), a lower number of TFs (p=1.4e-10) and less  
427 motifs (p=3.9e-8) at their TSS, as well as other features important for distinguishing between  
428 narrow-high and -low genes (Supplementary Fig. 5c-e). Overall, differentially expressed genes  
429 showed lower regulatory complexity as reflected in our broad and narrow variability indices  
430 (Fig 5b-c).

431 To assess this association more systematically, we next tested whether the model for predicting  
432 expression variation can also identify differentially expressed genes. We trained a random  
433 forest model using our embryonic data to classify the top-30% versus bottom-30% variable  
434 genes and used it to predict differential expression in adults subjected to different stresses

435 (Methods). The model predicted differential expression on the non-overlapping test set with an  
436 AUC of 0.65 and 0.74 when trained to predict embryonic variation for all genes, or for narrow  
437 promoter genes, respectively (Fig. 5d). This demonstrates that differential expression can be  
438 predicted based on a model trained for predicting expression variation. Since the model's  
439 performance was better when trained only on variation in narrow promoters, it is likely that the  
440 narrow-specific regulatory mechanisms, such as micro RNA and enhancers, determine a gene's  
441 responsiveness to stress. This is also reflected by the strong differences in narrow index  
442 between DE and non-DE genes (Fig 5c).

443 Overall, this suggests that the same buffering mechanisms confer expression robustness to  
444 different kinds of perturbations. Since the propensity to be differentially expressed is  
445 predictable based on genomically encoded features, this implies that results from differential  
446 expression studies should always be interpreted relative to a genes inherent tendency to respond  
447 to perturbation.

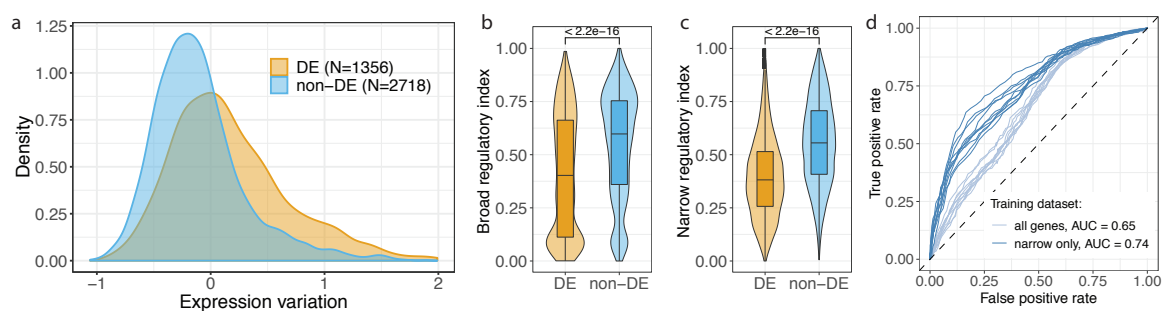

448

449 **Figure 5. Expression variation can predict signatures of differentially expression upon**  
450 **stress.** (A) Expression variation of genes differentially expressed (DE) upon any stress  
451 conditions from (Moskalev et al. 2015) compared to non-differentially expressed genes (non-  
452 DE). (B-C) Differences in scores by the regulatory complexity indices (from Fig. 4g) between  
453 DE and non-DE genes (from Fig. 6a): broad regulatory index (B), narrow regulatory index (C),  
454 P-values from Wilcoxon rank test. (D) ROC-curves for predicting DE with random forest  
455 models trained on expression variation (top-30% variable vs. bottom-30% variable) in all genes  
456 (light blue) or narrow promoter genes (dark blue). Models were trained and tested on non-  
457 overlapping subsets of genes in 10 random sampling rounds (all plotted). Median AUC values  
458 from 10 sampling rounds.

459

## 460 **Human promoter features predict both expression variation and differential expression**

461 Given that gene expression variation across individuals can be predicted from genomic features  
462 in *Drosophila* we next asked whether this holds true in humans, and whether the predictive  
463 features are conserved. We used high quality RNA-seq datasets from the GTEx project  
464 comprising 43 tissues with data for at least 100 individuals (GTEx Consortium 2013). For each  
465 tissue, we measured expression variation across individuals using the coefficient of variation  
466 corrected for mean-variance dependence, applying a similar approach as for *Drosophila*  
467 (Methods). Since gene expression variation values were highly correlated across all tissues  
468 (Supplementary Fig 6), we also computed the mean of tissue-specific variations (mean  
469 variation) as potentially more robust metrics.

470 Since TSS-proximal features were the most predictive of expression variation in fly, we  
471 focused on promoter features to train the models (Methods). This included promoter shape, TF  
472 binding at the TSS, chromatin states, and several sequence features (TATA-box, GC-content,  
473 CpG islands). To predict the mean expression variation, promoter shape and chromatin state  
474 features were aggregated across multiple tissues. In addition, we collated three tissue-specific  
475 datasets for muscle, lung and ovary by matching RNA-seq, CAGE and chromHMM datasets  
476 (Methods). Based only on these features, random forest models were able to predict expression  
477 variation and level within each tissue to a similar extent as in *Drosophila* embryos (Fig. 2f)  
478 with  $R^2$  ranging between 0.38-0.46 for expression variation and 0.19-0.24 for expression level  
479 (Fig. 6a). Aggregating expression variation across tissues yielded even higher performance  
480 with  $R^2$  of 0.56 versus 0.31 for mean level across all expressing tissues. The overall  
481 performance was robust to changes in the numbers of samples including subsetting by age or  
482 sex (Supplementary fig. 8a).

483 The predictive features of expression variation in humans are highly overlapping with those  
484 for *Drosophila* (Fig 6b,c), and include promoter shape, TATA-box, and the number of TFs

485 binding to the promoter. An additional feature highly predictive of genes with low expression  
486 variation was the presence of CpG islands, in line with previous findings in single-cells  
487 (Morgan and Marioni 2018), while bivalent TSS state was predictive of high expression  
488 variation, in line with previous studies (Faure, Schmiedel, and Lehner 2017) (Fig. 6b, c). We  
489 also uncovered a number of transcription factors predictive of low variation, including  
490 GABPA, YY1, and E2F1 (84 predictive TFs in total, Supplementary Table 17). Similar to  
491 *Drosophila*, the presence of TSS-proximal peaks of all 84 predictive TFs were associated with  
492 reduced mean expression variation, again suggesting that high variation (in bulk RNA-seq) is  
493 due to a lack of buffering mechanisms rather than a specific mechanism for noise amplification.  
494 Extending the distance around the TSS did not improve the correlation between presence of  
495 TF peaks and expression variation, indicating that the key regulatory information is already  
496 contained within the core promoter region (Supplementary fig 8b).

497 We next asked whether expression variation across individuals is predictive of differential  
498 expression in different conditions, as we observed in *Drosophila*. For this we used differential  
499 expression prior (DE prior), a metric that integrates more than 600 published differential  
500 expression datasets and reflects the probability of a gene to be DE irrespective of the biological  
501 condition tested (Crow et al. 2019). Indeed, DE prior is correlated with expression variation in  
502 all tissues (median Pearson correlation  $R=0.50$ ), while being uncorrelated with expression  
503 level (Supplementary Fig. 6). A model trained to predict the top-30% vs. bottom-30% most  
504 variable genes (based on the features predictive of mean expression variation) could predict  
505 DE prior with an AUC of 0.75 versus 0.85 when both training and testing are done on DE prior  
506 (Fig. 6d, Methods), and predictive features for variation showed similar effects in DE prior  
507 (Fig. 6e). This indicates that inherent promoter features can explain expression variation and  
508 the probability of differential expression to a similar extent – potentially, due to partially  
509 overlapping underlying mechanisms.



510 Importantly, both expression variation and DE prior were significantly lower for essential  
511 genes, while being higher for GWAS hits and common drug targets (Fig. 6f, Supplementary  
512 Fig. 8c). Higher expression variation of the latter agrees with an interpretation that these genes  
513 are less buffered to withstand different sources of variation (Fig 1a) and hence are more likely  
514 to change in expression level upon different types of perturbations including genetic or  
515 environmental factors. Hence, expression variation across individuals likely captures  
516 differences in selection pressure and cost-benefit trade-offs between expression precision and  
517 plasticity.

518 In summary, despite significant differences in promoter regions between humans and  
519 *Drosophila* (e.g. the presence of *Drosophila*-specific core promoter motifs, human-specific  
520 CpG islands, predominately unidirectional versus bidirectional transcription), promoter  
521 features are highly predictive of expression variation in both species. Genes with high variation  
522 tend to also have differential expression across diverse conditions, and are significantly  
523 enriched in GWAS hits, and disease associated loci.



524

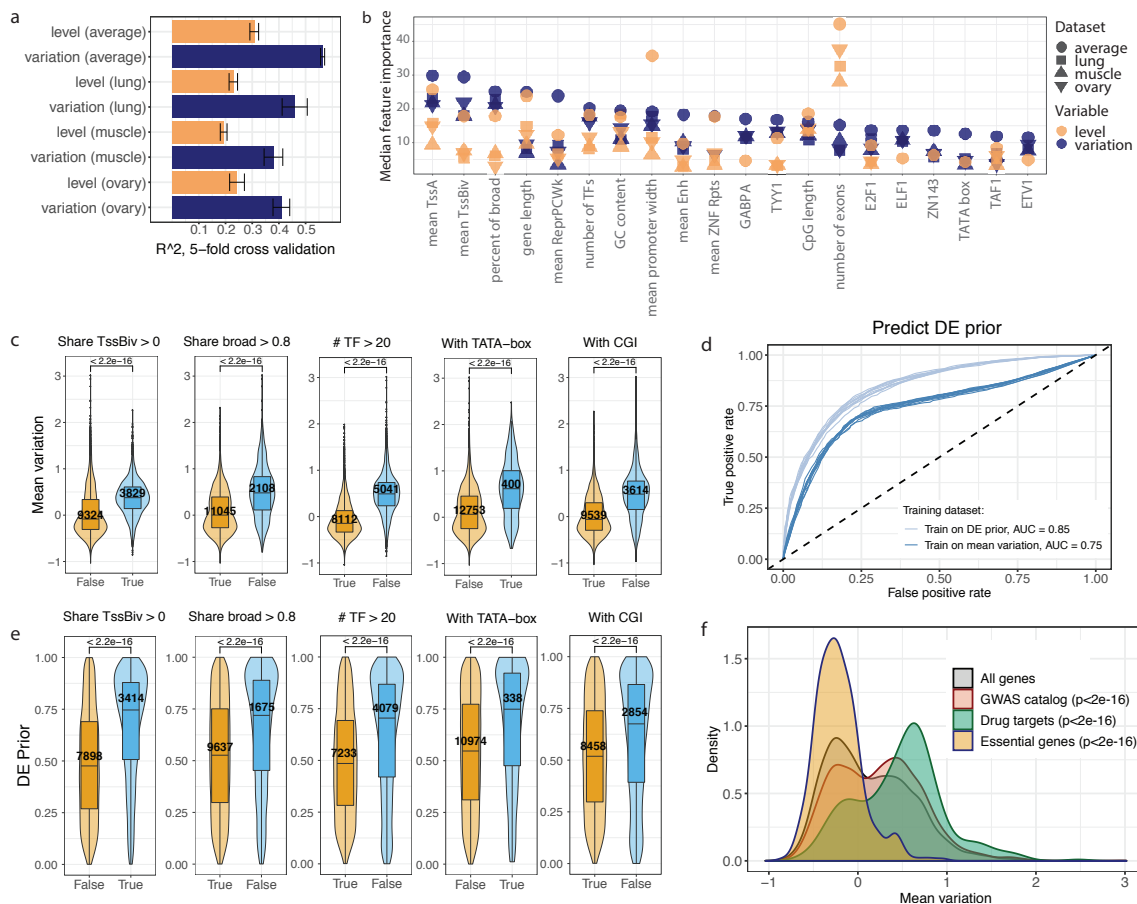

525

526

527 **Figure 6.** Features in human promoters predict both expression variation and differential  
528 expression. **(A)** Performance of random forest predictions (mean  $R^2$  from 5-fold cross-  
529 validation, whiskers = standard deviation) for expression level (orange) and variation (blue)  
530 trained on expression variation in tissue-specific RNA-seq (lung, ovary, and muscle), as well  
531 as mean variation across 43 tissues (Methods). **(B)** Top-20 features for predicting expression  
532 variation using Boruta feature selection. Features ordered by their importance for expression  
533 variation (blue), showing the corresponding importance for level (orange). Shapes indicate four  
534 different datasets (three tissues and mean variation). **(C,E)** Differences in expression variation  
535 (C) and DE prior (E) for some of the top-predictive features from (B). P-values = Wilcoxon  
536 test, number of genes indicated. ‘Share TssBiv > 0’ indicates genes that have “TSS bivalent”  
537 chromatin state (chomHMM, Methods) in at least one tissue. ‘Share broad > 0.8’ indicates  
538 genes which have broad promoter in at least 80% of tissues where it is expressed (Methods).  
539 **(D)** ROC-curves for predicting DE prior (top-30% variable vs. bottom-30%) with random  
540 forest models trained on DE prior (light blue) and mean expression variation (dark blue).  
541 Models trained and tested on non-overlapping subsets of genes in 10 random sampling rounds  
542 (all plotted), with median AUC values indicated. **(F)** Mean expression variation of specific  
543 genes groups (GWAS hits, essential genes, drug targets) compared to the distribution of mean  
544 expression variation for all genes in the dataset.

## 545 **Discussion**

546 Our analysis suggests that expression variation across a population of multicellular genetically  
547 diverse individuals is gene-specific and can be explained by genetically encoded regulatory  
548 features, all highly correlated with core promoter architecture. Overall, we found that  
549 regulatory complexity positively correlates with robust gene expression. Yet we identified two  
550 independent mechanism that decrease expression variation depending on the core promoter  
551 architecture. Genes with broad core promoters in *Drosophila* were overall less variable and  
552 characterized by ubiquitously open chromatin and a high number of transcription factors (TFs)  
553 binding to the TSS-proximal region. In contrast, genes with a narrow core promoter had a much  
554 higher spread of expression variation, which was, in addition to TFs, modulated by regulatory  
555 complexity outside of core promoters (miRNAs, enhancers and Pol II pausing).

556 We found that similar promoter-related features were predictive of expression variation across  
557 human individuals by applying the same predictive framework to tissue-specific RNA-seq  
558 datasets. This was surprising given the differences in promoter features between *Drosophila*  
559 and mammals, with higher heterogeneity within broad promoters and high regulatory  
560 importance of CpG islands (Haberle and Stark 2018; Lenhard, Sandelin, and Carninci 2012),  
561 and suggests that some core promoter properties are ancient features that reduce expression  
562 noise, which agrees with conclusion of previous studies (Carey et al. 2013; Metzger et al.  
563 2015).

564 Gene expression variation can arise from a multiplicity of stochastic, environmental and  
565 genetic factors, and defining the exact cause of expression variation in a particular experiment  
566 is likely an intractable task. Even for single cell experiments, which can control for genetic and  
567 macro-environmental factors, there is ongoing debate as to whether the observed gene-specific  
568 expression variation can be explained by intrinsic (e.g. transcription bursting) or extrinsic (cell-

569 to-cell variability) factors (Battich, Stoeger, and Pelkmans 2015; Larsson et al. 2019; Foreman  
570 and Wollman 2019), or whether these are sources are indistinguishable (Eling, Morgan, and  
571 Marioni 2019). Yet, despite the differences in interpretation of the underlying sources of  
572 variation, there is a consensus that genes differ in their expression variation. Here, we found  
573 that gene expression variation, in bulk data from thousands of cells, was highly reproducible  
574 across different datasets, including developmental time-points in *Drosophila* and tissues in  
575 human, and did not depend on the identity of samples used. This suggests that gene expression  
576 variation, along with expression level, can be used as an informative readout of gene function  
577 and regulation in multiple biological contexts.

578 Interestingly, we recapitulated most of the regulatory features previously linked to expression  
579 noise in single cell experiments (Ravarani et al. 2015; Morgan and Marioni 2018; Faure,  
580 Schmiedel, and Lehner 2017; Perry et al. 2010; Boettiger and Levine 2009; Schmiedel et al.  
581 2018), despite the fact that the composition of variation sources is very different between bulk  
582 and single cell experiments. A number of studies have proposed that robustness to stochastic  
583 noise and robustness to environmental and genetic variation are highly correlated (Lehner  
584 2008; Ciliberti et al. 2007; Kaneko 2011). In line with this hypothesis, expression variation in  
585 bulk is predictive of single-cell noise in yeast (Dong et al. 2011) and gene expression variation  
586 across individuals in human tissue samples correlates with promoter strength and multiple  
587 epigenetic features (Alemu et al. 2014). Indeed, genes that have evolved mechanisms to buffer  
588 stochastic variation in the levels of their expression may also be insensitive to non-stochastic  
589 changes, including genetic and environmental variation, as the same mechanisms would  
590 constrain them both (Lehner 2008).

591 In line with the above, it was recently shown that the results of many differential expression  
592 experiments are generally predictable and to a large extent reflect some basic underlying

593 biology of the genes, rather than specific conditions tested (Crow et al. 2019). Our results  
594 confirm and substantially extend this model - we show that the likelihood of a gene to be  
595 differentially expressed is highly correlated with the gene's expression variation (independent  
596 of expression level) and the corresponding predictive regulatory features. This result is  
597 important, as standard differential expression pipelines correct for variance dependence on the  
598 expression level (Love, Anders, and Huber 2014) but do not take any other gene-specific  
599 properties into account. Given the extensive amount of accumulated knowledge about  
600 regulatory features, taking into account gene-specific differences in expression variation and  
601 the underlying regulatory mechanisms will improve specificity and interpretability of  
602 differential expression results.

603 Finally, here we focused on the most general mechanisms robustly linked to gene expression  
604 variation regardless of the specific tissue identity or developmental stage. There is, however,  
605 accumulating evidence that changes in expression variation can be an important indicator of  
606 specific biological processes happening in an organism. In particular, stochasticity of  
607 expression can differ by developmental stage i.e. following an hourglass pattern in early  
608 development (Liu et al. 2019) or decreasing with cell fate commitment (Eling et al. 2018;  
609 Richard et al. 2016). On the other hand, an increase in expression stochasticity has been linked  
610 to ageing (Viñuela et al. 2018; Kedlian, Melike Donertas, and Thornton 2019) and certain  
611 disease conditions (Zhang et al. 2015; Ran and Daye 2017). Hence, combining information on  
612 expected gene expression variation with tissue or disease-specific data might provide  
613 additional insights to condition-specific gene regulation in complex biological systems.

## 614 **Methods**

### 615 **Gene expression level and variation in *Drosophila* DGRP lines**

616 ***Gene expression quantification.*** To quantify gene expression, we re-processed the single-end  
617 strand-specific 3'-Tag-seq data (Cannavò et al. 2016) for 75 inbred wild *Drosophila* isolates  
618 from the *Drosophila melanogaster* Genetic Reference Panel (Mackay et al. 2012) at three time-  
619 points during embryonic development (2-4, 6-8 and 10-12 hours after fertilization, 225 samples  
620 in total, each containing pool of approximately 100 embryos). Reads were trimmed using  
621 Trimmomatic v.0.33 software (Bolger, Lohse, and Usadel 2014) with the following  
622 parameters: -phred33 HEADCROP:7 CROP:43. Alignment to dm6 genome version was done  
623 with bwa v.0.7.17 aln (parameters: -n 5 -e 10 -q 20) and samse (parameters: -n 1) tools (Heng  
624 Li and Durbin 2010). Reads with mapping quality below 20 were removed using samtools view  
625 v1.9 (H. Li et al. 2009). Expression was quantified with HTSeq count v.0.9.1 (Anders, Pyl, and  
626 Huber 2015) (parameters: -m intersection-nonempty -f bam -s yes -q -i Parent). PolyA sites  
627 were identified by reproducing the analysis of the polyadenylation dataset published in  
628 (Cannavò et al. 2016) after mapping the reads to the dm6 genome assembly. We observed a  
629 partial failure of strand specificity in generating the sequencing libraries: highly expressed  
630 polyA sites showed a corresponding antisense site. To remove these artefacts, we excluded  
631 polyA sites that were perfectly included in an antisense site. Reads that spanned both the last  
632 transcribed base and the subsequent polyadenylation tail allowed for single base resolution  
633 identification of the cleavage site. We extended polyA sites 200bp downstream or up to the  
634 nearest polyA site. To identify cleavage sites within our polyA sites we produced strand  
635 specific coverage tracks of the 3'-terminal base for each of the polyadenylation reads. Within  
636 each pA region, we identified the major cleavage site as the genomic base with highest 3'-  
637 terminal base coverage.

638 ***Expression data filtering and measuring expression variation.*** All samples selected for the  
639 analysis had high sequencing quality and were accurately staged, as described in original  
640 publication (Cannavò et al. 2016). Using principal component analysis on the expression  
641 counts from all 225 samples after applying variance stabilization transformation from DESeq2  
642 (Anders and Huber 2010), we confirmed that samples clustered by developmental time-point  
643 (Supplementary fig 1a) and not sequencing batch (Suppl. fig 1b).

644 Expression counts from 225 samples were jointly normalized using effectSize normalization  
645 from DESeq2 package (Anders and Huber 2010). For each time-point separately, we calculated  
646 median expression and coefficient of variation (CV, standard deviation divided by mean) for  
647 each gene across 75 samples. Genes with zero median expression were removed as non-  
648 expressed. Coefficient of variation exhibited strong negative relationship with median  
649 expression level (Fig. 1b) which agrees with other gene expression studies (Anders and Huber  
650 2010; Ran and Daye 2017; Faure, Schmiedel, and Lehner 2017; Eling et al. 2018). To account  
651 for this relationship, we used Locally weighed regression (LOESS) of coefficient of variation  
652 on the median expression (loess function in R from stats library, degree = 1, span = 0.75) (R  
653 Development Core Team 2013). Residuals from LOESS regression (resid\_cv, residual  
654 coefficient of variation) were used in all subsequent analysis and referred to as gene *expression*  
655 *variation*.

656 To check whether residual expression variation actually reflects expression heterogeneity  
657 (across samples) at any given expression level, we took the following approach. Genes were  
658 grouped into 20 bins by their median expression level across 75 samples (separately for each  
659 time-point). Within each bin, genes were ordered by their residual coefficient of variation (x-  
660 axis), and normalized expression counts for each sample were plotted on the y-axis (example  
661 for 10-12h in Supplementary Fig. 1c). For almost all of the expression bins, spread of  
662 expression values increased for higher residual coefficient of variation, except bin-20 (top-5%

663 genes by expression level) and to less extend bin-1 (bottom-5%). Based on this analysis, top  
664 and bottom-5% of expressed genes were excluded from the analysis.

665 We focused our analysis on the latest developmental stage (10-12h) and removed genes that  
666 decreased in expression between 2-4h and 10-12h after fertilization. This was done to reduce  
667 confounding effects of maternal mRNA degradation and focus on the stage when zygotic  
668 genome is fully activated (both processes happening from 2h post fertilization onwards). In  
669 total, we excluded 3275 genes, from which 90% were detected as maternally deposited (in  
670 house data, genes expressed in unfertilized eggs). In addition, genes with the strongest decrease  
671 in expression (3-fold or more) were highly enriched in cell cycle biological processes  
672 (Supplementary table 7), and cell cycle is known to slow down at later developmental stages  
673 (Edgar and O'Farrel 1989). Hence, we reasoned that variation of these genes might be strongly  
674 confounded by extrinsic factors (maternal mRNA degradation and cell cycle) that are not of  
675 particular interest for this analysis.

676 Overall, the following filtering steps were applied to the data, and the corresponding genes  
677 were excluded from the final dataset:

- 678 1. Genes with zero median expression level across samples (as non-expressed  
679 genes);
- 680 2. Genes falling into top and bottom 5% by expression level (as potential source  
681 of outliers);
- 682 3. Genes that decreased in expression between 10-12 and 2-4 hours after  
683 fertilization (as maternal genes with role in early embryonic development and potential  
684 targets for maternal mRNA degradation)
- 685 4. Genes with missing values in the feature table (see below) unless the feature  
686 can be easily imputed, i.e. 0 for the absence of transcription factor motif



687 Hence, our final dataset included 4074 genes at 10-12 hours post fertilisation. Final measure  
688 of expression variation was calculated as described above on the final set of genes to avoid  
689 residual dependence on the expression level after filtering (Fig. 1b, '*resid\_cv*' column in  
690 Supplementary table 3). Full dataset for all these time-points including expression variation  
691 calculated at several intermediate filtering steps are provided in Supplementary Table 2.

692 ***Expression variation on the subsets of samples.*** To test robustness of expression variation to  
693 the selection of samples (and hence potential batch effects), we performed multiple rounds of  
694 sample subsetting. Our full dataset comprised 75 samples (75 DGRP lines). For a given subset  
695 size N, we randomly selected N samples from the full dataset. Gene expression variation was  
696 calculated on this subset as described above (including fitting LOESS regression), and Pearson  
697 correlation of resulting variation values with the variation on the full dataset was recorded.  
698 Random selection of samples was performed 100 times for each N. This was done for the  
699 following subset sizes: 5, 10, 20, 30, 40, 50, 60, 70, and 74 samples. Mean and standard  
700 deviation of correlation values upon 100 rounds of sampling for each subset size are shown in  
701 Fig 1c.

702 ***Expression level and variation of neighboring genes.*** For this analysis we considered all pairs  
703 of genes located on the same chromosomes and with TSS to TSS distance below 100 kB. Genes  
704 pairs were binned into 5 quantiles by the distance between their TSSs. Coordinates of the  
705 topologically associated domains (TADs) were taken from the high-resolution HiC in Kc cells  
706 (Ramírez et al. 2018). Genes were assigned to TADs based on their TSS coordinates, and for  
707 all pairs of genes we defined whether they belong to the same TAD or span the TAD border.  
708 Within the resulting 10 groups of gene pairs (5 quantiles \* same/different TAD), we calculated  
709 Spearman correlation coefficients in expression variation and median expression level between  
710 genes in the pairs (Supplementary Fig 1d).



711 ***Alternative measures of expression variation.*** As alternative measures of expression variation,  
712 we used the following metrics:

- 713 1. sd\_vst: standard deviation after applying variance stabilizing transformation  
714 from DESeq2 package to remove mean-variance dependence (instead of taking LOESS  
715 residuals)
- 716 2. resid\_sd: LOESS residuals from regressing standard deviation on median  
717 expression
- 718 3. resid\_mad: LOESS residuals from regressing median absolute deviation on  
719 median expression
- 720 4. resid\_iqr: LOESS residuals from regressing interquartile range (between 25<sup>th</sup>  
721 and 75<sup>th</sup> percentiles) on median expression

722 These measures were calculated on the final set of 4074 genes at 10-12h post fertilization.  
723 Dependences on the median expression before and after correction for these measures are  
724 provided in Supplementary fig 2a. Pearson correlations with expression variation measured by  
725 resid\_cv are shown in Suppl. fig 2b.

726

### 727 **Compiling Feature table for *Drosophila* dataset**

728 Full list of features used in this analysis is provided in Supplementary table 1. The features  
729 were grouped into seven classes (column '*Feature class*' in Supplementary table 1): Genetics,  
730 Gene type, Gene body, TSS, 3'UTR, Distal regulators, and Gene context. Summary on  
731 assignment of features to classes is provided in Table 1. Below are the more detailed  
732 descriptions of how individual features were generated. Full feature table and final dataset are  
733 provided in Supplementary tables 2 and 3, respectively.

734 **Basic gene properties and functional annotations.** We used Flybase v6.13 genome annotation  
735 to find gene length (length\_nt), number of transcripts (n\_transcripts) and number of exons  
736 (n\_exons) for each gene. Number of exons was defined as total number of unique exons  
737 regardless of transcript isoforms. Next, we used several gene annotations from in-house or  
738 external sources to identify specific functional groups of genes. Ubiquitously expressed genes  
739 (is\_ubiquitous) were defined based on BDGP database (Tomancak et al. 2002) as genes having  
740 ubiquitous expression pattern in at least one developmental stage (data available for *Drosophila*  
741 embryonic stages 4-6, 7-8, 9-10, 11-12, 13-16). Maternally deposited genes (is\_maternal) were  
742 defined as genes expressed in unfertilized eggs the vgn line of *Drosophila melanogaster* at 2-  
743 4 or 6-8 hours after egg laying (in-house data, unpublished). Housekeeping genes  
744 (is\_housekeeping) were defined following methodology in (Ulianov et al. 2015) as genes  
745 expressed with RPKM > 1 in all samples from (Graveley et al. 2010). List of transcription  
746 factors (is\_tf) comes from (Hammonds et al. 2013) dataset.

747 **Human orthologs for *Drosophila* genes.** Human orthologs for *Drosophila melanogaster* genes  
748 were identified with DIOPT - DRSC Integrative Ortholog Prediction Tool (Hu et al. 2011), and  
749 two features provided by the tool were added for each gene – conservation score  
750 (conserv\_score, continuous variable indicating confidence of ortholog prediction) and  
751 conservation rank (conserv\_rank, factor variable taking the following values: none, low,  
752 moderate, high). Genes with ‘high’ conservation rank were referred to as “conserved with  
753 human” (e.g. Supplementary Fig 3c).

754 **Genetics.** *Cis share* (cis) was used as an estimate of the contribution of genetic variation to the  
755 total gene expression variation. To calculate it, we used LIMIX variance decomposition  
756 (Lippert et al. 2014) on normalized expression matrix (three time-points combined) to assess  
757 the proportion of gene expression variation explained by cis, population structure and  
758 time/environment. *3'UTR variant index* (utr3\_variant\_index) was used to approximate a

759 potential effect of mappability bias (because expression was estimated from 3' Tag-seq data)  
760 as well as sequence variation on gene expression variation. It was calculated with the following  
761 formula: (total number of variants in gene's 3'UTR × mean allele frequency of variants) / total  
762 length of 3'UTR peaks. The variant counts and variant allele frequencies were obtained from  
763 the DGRP freeze 2 .vcf file (W. Huang et al. 2014), considering only the 75 lines used in this  
764 study. *Presence of eQTL* (with\_eQTL) indicates whether a gene has associated expression QTL  
765 identified in (Cannavò et al. 2016) on the expression dataset, which is also used in this study.

766 **GC-content.** GC-content was calculated using bedtools-2.27.1 nuc software (Quinlan and Hall  
767 2010) for nucleotide sequences of genes (gene\_gc) and regions of -100/+50 bp around gene  
768 TSS annotations from Flybase v6.13 (tss\_gc).

769 **Pausing Index, Promoter shape and promoter motifs.** Polymerase II pausing index (defined  
770 as the density of polymerases in the promoter region divided by the gene body) in *Drosophila*  
771 *melanogaster* embryos was taken from (Saunders et al. 2013).

772 Promoter shape index was defined in the earlier paper (Schor *et al.*, 2017) following the  
773 methodology from (Hoskins et al. 2011). In brief, promoter shape index is Shannon entropy  
774 of the TSS distribution within a promoter:

$$775 \quad SI = 2 + \sum_1^L p_i \log_2 p_i ,$$

776 where  $p$  is the probability of observing a TSS at base position  $i$  within the promoter,  $L$  is the  
777 set of base positions that have at least one TSS tag, and TSS positions were identified using  
778 the aggregated CAGE signal for all time points and 81 fly lines from the *Drosophila* Genetic  
779 Reference Panel (DGRP) at three developmental time-points (Schor et al. 2017). For each gene,  
780 we recorded promoter shape index of the most expressed TSS cluster (major\_shape\_ind).  
781 Promoters of genes were classified as broad if shape index of the most expressed TSS was  
782 below -1, and narrow otherwise. The threshold is based on the bimodality of shape index

783 distribution and was defined in the original publication (Hoskins et al. 2011). If any of  
784 alternative TSSs of a gene had shape different from the most expressed one, `alt_shape` feature  
785 took value of 1 (and 0 otherwise).

786 PWMs for 8 core promoter motifs (Ohler et al. 2002; Ohler 2006) were scanned in -100/+50  
787 bp region around annotated TSSs from Flybase v6.13 using `fimo-4.11.3` software (Bailey et al.  
788 2009) with uniform background (`--bgfile -uniform--`), no reverse compliment (`--norc`), and  
789 default p-value threshold ( $1e-4$ ). Motifs were first scanned for the 5'-most TSS of each gene  
790 (start coordinate of genes in gff annotation) and referred to as '`ohler_maj.motif_name`' (e.g.  
791 `ohler_maj.TATA` for TATA-box; 0/1 for motif absence/presence respectively). In addition,  
792 motifs were scanned for TSSs of all transcripts for each gene (start coordinates of transcripts  
793 in gff annotation). If motif was predicted for some of the transcript TSSs but not for the gene  
794 TSS, then the corresponding feature `ohler_alt.motif_name` took value of 1, otherwise 0.

795 ***DNase hypersensitive sites.*** DNase hypersensitive sites (DHS) in *Drosophila melanogaster*  
796 embryos were identified in [Reddington et al, submitted]. The experiment was conducted at  
797 four developmental time-points in whole embryo (2-4h, 4-6h, 6-8h, and 10-12h after  
798 fertilization) and with tissue sorting (mesoderm, neuroectoderm, and other (double negative)  
799 at all time-points except 2-4h; bin-positive and bin-negative mesoderm (marker for visceral  
800 muscles) at 6-8h). This resulted in 19 experiments, which we refer to here as *DHS conditions*.  
801 Peaks called in all experiments were combined in a single table, and for each DHS, conditions  
802 when the site was accessible were recorded. Coordinates of DHS peaks from the combined  
803 table were lifted over from dm3 to dm6 genome version using UCSC `liftOver-5.2013` tool  
804 (Kent et al. 2002).

805 For each gene, we quantified a number of features related to DHS in TSS-proximal (+/- 500  
806 bp. around TSS from gene annotation, class TSS) or TSS-distal (more than 500 bp and less  
807 than 10kB around annotated TSS, class Distal regulators):

808 - Number of conditions with DHS (`num_dhs_conditins.prox` and  
809 `num_dhs_conditions.dist`) is the number of conditions (out of 19 in total) when there  
810 was a DHS peak detected in TSS-proximal or TSS distal region.

811 - DHS tissue profile (`dht_tissue_profile.prox` and `dhs_tissue_profile.dist`)  
812 summarizes accessibility profile across tissues and takes the following values: 1 – peak  
813 present only in tissues (any of mesoderm, neuroectoderm and double negative); 2 -  
814 present in whole embryo (WE); 3 – both in WE and tissues.

815 - DHS time profile (`dhs_time_profile.prox` and `dhs_time_profile.prox`) reflects  
816 accessibility profile across developmental time points: 1 – peak present only at early  
817 developmental time-points (2-4h, 4-6h or 6-8h after fertilization); 2 – peak present only  
818 at late developmental time-points (8-10h or 10-12h after fertilization); 3 – peak present  
819 in at least one early and late time-point.

820 - Presence of ubiquitous DHS (`is_ubiq.prox` and `is_ubiq_dist`) indicates presence  
821 of ubiquitously accessible DHS peak in the corresponding genomic region. We consider  
822 DHS peak ubiquitous if it was present in all three tissues at four developmental time-  
823 points where tissue sorting was done (12 conditions in total).

824 - Number of DHS peaks (`num_dhs_any.prox` and `num_dhs_any.dist`) is the total  
825 number of non-overlapping DHS peaks in the corresponding intervals present in any of  
826 the 19 conditions.

827 ***DNA binding proteins.*** 280 embryonic ChIP-seq datasets for various DNA binding proteins  
828 (referred to as transcription factors or TFs for simplicity though not all of them have  
829 transcription factor activity) were downloaded from modERN database (Kudron et al. 2018).  
830 Of note, for several transcription factors, ChIP-seq data are available either for several  
831 developmental time-points (Trl at 0-24h, 8-16, and 16-24h. after fertilization) or for several  
832 experimental setups (`chif-RA-GFP` and `chif-RB-GFP`). In case more than one data set was

833 available for a TF it was included independently. For the analysis, we used peaks called  
834 according to the methodology from the original publication (IDR threshold of 0.01, optimal  
835 set). ChIP-seq peaks were overlapped with DHS coordinates (single base pair overlap required)  
836 using `findOverlaps` function from `GenomicRanges` package in R (Lawrence et al. 2013)  
837 resulting in 280 binary variables (1/0 for presence/absence of each TF) were added to the DHS  
838 table. These data were then summarized for each gene's TSS-proximal and TSS-distal region  
839 resulting in the following variables:

840 - Presence of TF peak in TSS-proximal DHSs (280 variables with name format  
841 like `modERN.tf_name.prox`) and TSS-distal DHSs (280 variables with name format  
842 like `modERN.tf_name.dist`); 1 – peak present (any number of occurrences), 0 – peak  
843 absent.

844 - Total number of different TF peaks overlapping TSS-proximal  
845 (`num_tf_peaks.prox`) and TSS-distal (`num_tf_peaks.dist`) DHS.

846 640 PWMs for different TF binding motifs (*Drosophila melanogaster* database, version  
847 available on 05.03.2019) were downloaded from CIS-BP database (Weirauch et al. 2015).  
848 PWMs were scanned in the sequences of DHSs resized to 200 bp. width using `fimo-4.11.3`  
849 software (Bailey et al. 2009) with uniform background (`--bgfile --uniform--`), with reverse  
850 compliment (default), and default p-value threshold ( $1e-4$ ). Similar to TF peaks, these data  
851 were then summarized for each gene's TSS-proximal and TSS-distal region resulting in the  
852 following variables:

853 - Presence of TF motif in TSS-proximal DHSs (280 variables with name format  
854 like `cisbp.tf_name.prox`) and TSS-distal DHSs (280 variables with name format like  
855 `cisbp.tf_name.dist`); 1 – motif present (any number of occurrences), 0 – motif absent.

856 - Total number of different TF motifs overlapping TSS-proximal  
857 (`num_tf_motifs.prox`) and TSS-distal (`num_tf_motifs.dist`) DHS.

858 **Chromatin colours.** Annotation of chromatin states (5 states) was taken from (Filion et al.  
859 2010). Coordinates of genomic regions assigned to different colours were overlapped with  
860 DHS table, and for each DHS overlap with any of the colours by at least 1 bp. was recorded.  
861 The results were aggregated by gene into 5 TSS-proximal (i.e. color\_green.prox) and 5 TSS-  
862 distal (i.e. color\_green.dist) binary features indicating presence/absence of the corresponding  
863 states.

864 **Annotated enhancers.** We used several datasets of annotated enhancers from the following  
865 sources:

- 866 - Combined set of CAD4 enhancers (curated in-house list from various sources)  
867 and Vienna tiles (Kvon et al. 2014) lifted over to dm6 genome version;
- 868 - Combined set of cis-regulatory modules (CRMs) of mesoderm TFs (Zinzen et  
869 al. 2009) and cardiac TFs (Junion et al. 2012) lifted over to dm6 genome version;

870 Both datasets were first overlapped with DHS table and number of annotated enhancer  
871 elements in TSS-proximal and TSS-distal regions were added to the feature table.

872 **3'UTR features.** PWM of micro-RNAs (miRNAs) from MIRBASE (Kozomara and Griffiths-  
873 Jones 2014; Kozomara, Birgaoanu, and Griffiths-Jones 2019) and RNA-binding proteins  
874 (RBPs) from CISBP-RNA (Ray et al. 2013) were downloaded from MEME v4 (Bailey et al.  
875 2009), files *Drosophila\_melanogaster\_dme.dna\_encoded.meme* and  
876 *Drosophila\_melanogaster.dna\_encoded.meme* for miRNA and RBP PWMs respectively.  
877 3'UTRs were defined as the region comprised between a major cleavage site (as defined above)  
878 and the closest annotated stop codon. PWMs were scanned in nucleotide sequences of the  
879 3'UTRs using fimo-4.11.3 software (Bailey et al. 2009) with uniform background (--bgfile --  
880 uniform--), no reverse compliment (--norc), and default p-value threshold (1e-4). Features for  
881 motif occurrences have were named mirbase.motif\_name and cisbp\_rna.motif\_name for

882 miRNA and RBP motifs respectively. The feature took value of 1 for a gene if the  
883 corresponding motif was predicted for any of the annotated 3'UTRs of a gene and 0 otherwise.  
884 Total number of unique miRNA and RBP motifs per gene were counted and included as  
885 num\_mirna and num\_rbp features respectively.

886 Lists of genes that are putative targets of Pumilio (embryonic and adult data) and Smaug  
887 (embryonic data) RBPs were obtained from (Gerber et al. 2006) and (Chen et al. 2014),  
888 respectively.

889 For each gene, we calculated the mean UTR length at different time points as the weighted  
890 mean UTR length between UTR isoforms. We used the polyA site expression as weights in the  
891 mean calculation. Since length of 3'UTR was highly correlated with gene length (Spearman  
892 correlation,  $Rho=0.62$ ), utr3\_length feature was calculated as actual 3'UTR length divided by  
893 gene length. Finally, 3'UTR length changes (log2-fold change) between different time-points  
894 (10-12h vs. 6-8h, 6-8h vs. 2-4h, 10-12h vs 2-4h) were calculated for each gene  
895 (utr3\_l2fc\_10vs6, utr3\_l2fc\_6vs2, and utr3\_l2fc\_10vs2 features).

896 **Genomic context features.** Insulation score (ins\_score\_2\_4h and ins\_score\_6\_8h) was  
897 calculated based on Hi-C data in-house data (unpublished) for *Drosophila melanogaster*  
898 embryos at 2-4 and 6-8 hours after fertilization (in-nucleus ligation, whole embryo). To assign  
899 insulation score to genes, we recorded the nearest value to the annotated TSS of each gene.

900 Coordinates of topologically associated domains (TADs) were taken from the high-resolution  
901 Hi-C in Kc cells from (Ramírez et al. 2018) and Hi-C in 2-4h embryos (in-house data,  
902 unpublished). Each gene was then assigned to TAD from the two aforementioned annotations  
903 based on its TSS coordinate, and distance to TAD border and TAD size were recorded  
904 (dist\_to\_tad\_border.ramirez, dist\_to\_tad\_border.2\_4h, tad\_size.ramirez, and tad\_size.2\_4h,  
905 respectively).



906 Gene density was calculated as number of genes in +/-1000 bp and +/-20kB from the TSS of  
907 each gene (num\_genes.prox and num\_genes\_dist, respectively) based on Flybase v6.13  
908 genome annotation.

909 **Broad and narrow indices.** Broad and narrow indices were calculated based on the subset of  
910 features from the feature table. Broad index was composed of the following features (all TSS-  
911 proximal): number of conditions with DHS (num\_dhs\_conditions.prox) , number of TF peaks  
912 (num\_tf\_peaks.prox), number of TF motifs (num\_tf\_motifs.prox). Narrow index was  
913 composed of number of TSS-distal DHSs (num\_dhs\_any.dist), number of miRNA motifs  
914 (num\_miRNA), and Pol II pausing index (PI). All features were first converted to ranks  
915 (random order for ties). Indices were calculated as simple averages of the corresponding  
916 features.

917

## 918 **Measuring expression level and variation in human tissues**

919

920 **Genome version.** We used Ensembl GRCH37/hg19 genome version downloaded from UCSC  
921 table browser (Kent et al. 2002; Haussler et al. 2019) throughout the analysis. Sex  
922 chromosomes and non-standard chromosomes were removed for all subsequent analyses. For  
923 selecting the main transcript per gene we used GRCH37/hg19 genome annotation downloaded  
924 from Ensembl website (Cunningham et al. 2019).

925 **Quantifying expression level and variation.** Gene expression matrix (raw read counts) was  
926 downloaded from the GTEx project website (GTEx Consortium 2013). Gene read counts  
927 matrices per tissues were produced by using GTEx sample details downloaded from GTEx  
928 website. Tissues with more than 100 samples (43 tissues in total) were chosen for further  
929 analysis (Supplementary table 8). In each tissue, genes with 0 median counts were removed  
930 and expression counts were normalized using size factor normalization from DESeq2 package

931 in R (Love, Anders, and Huber 2014). Median expression levels were calculation for each gene  
932 in each tissue and converted to log-scale (natural logarithm) for subsequent analysis.

933 Next, we removed top-5% of genes by median expression level as potential outliers, following  
934 the same reasoning as for Drosophila. Since distributions of gene expression in all tissues had  
935 long left tails, we set additional stringent threshold on lowly expressed genes (minimum  
936 median of 5).

937 Gene expression variation was calculated on the final set of genes for each tissue following the  
938 same approach as for Drosophila. Namely, gene expression variation was defined as the  
939 residuals from the local linear regression of coefficient of variation (CV) on the median  
940 expression (both on the log-scale, loess function in R from stats library, span = 0.25 and degree  
941 = 1). Gene expression levels and variations in all tissues are provided in Supplementary table  
942 9.

943 Mean expression variation for each gene was calculated as the mean of expression variations  
944 in all tissues where a gene was expressed using final tables that passed all filtering steps.  
945 Similarly, mean expression level was calculated by computing the mean of median expression  
946 levels in all tissues where a gene was expressed. Mean expression variation calculated in this  
947 way exhibited weak dependence on mean expression level (Spearman correlation,  $Rho=-0.11$ ).  
948 To control for this effect, we also calculated ‘global mean variation’ as the residuals from the  
949 local linear regression of the mean CV on the mean expression level (calculated as above). This  
950 measure was highly correlated with mean variation (Supplementary fig S6) and showed similar  
951 results in the downstream analysis (results not shown, global mean variation is provided in  
952 Supplementary Table 9).

953 **Feature tables for human dataset**

954 Only TSS-proximal features and several gene properties (i.e. gene length and number of  
955 transcripts) were used to predict expression level and variation in human. Full list of features  
956 used in this analysis is provided in Supplementary table 10. Most of the TSS-proximal features  
957 (TF peaks and chromatin states) were scanned in the  $-500/+500$  bp of the main TSS of the  
958 genes (referred to as *TSS-proximal regions*), following the same approach as for *Drosophila*.  
959 Several features more strictly linked to the gene core promoters (promoter shape, TATA-box,  
960 CpG islands, and promoter GC-content) were scanned in  $-300/+200$  bp of the main TSS of the  
961 genes (referred to as *core promoter regions*).

962 **Gene properties.** Number of transcripts, gene length, mean exon length, number of exons and  
963 exon length mean absolute deviation were calculated for each gene directly using hg19 genome  
964 annotation from Ensembl website (Cunningham et al. 2019). Transcripts width was calculated  
965 for each transcript by using the same file, and length of the main transcript was assigned to  
966 each gene.

967 **Promoter Shape.** CAGE data for 31 tissues (library size of about 10M mapped reads or above,  
968 Supplementary table 11) was downloaded from FANTOM5 project (Lizio et al. 2015) using  
969 CAGER package in R (Haberle et al. 2015). On each dataset separately, we did power-law  
970 normalization (Balwierz et al. 2009) using CAGER package. TSSs with low count numbers  
971 (less than 5 counts) were removed. Next, we applied a simple clustering method (distclu,  
972 maximum distance = 20) from CAGER package on each dataset separately. Clusters with low  
973 normalized CAGE signals (sum of TSSs normalized signals of the cluster below 10-50  
974 depending on the tissue) were removed. CAGE clusters were then assigned to genes by  
975 overlapping them with core promoter regions ( $-300/+200$  bp around TSSs of all annotated  
976 transcripts). Clusters that did not overlap any core promoters were removed.

977 Next we defined promoter shape for all CAGE clusters by using two commonly accepted  
978 metrics: promoter width and promoter shape index. Promoter width was calculated by using

979 the inter-percentile width of 0.05 and 0.95 following methodology from (Haberle et al. 2015).  
980 Promoter shape index (SI) was calculated by the formula as above (*Drosophila* section)  
981 proposed in (Hoskins et al. 2011).

982 For classifying promoters into broad and narrow based on promoter width, we used the  
983 following approach. First, we did a linear transformation of promoter width values (actual  
984 value minus 1 divided by 10; for fitting gamma distribution) On the transformed data, we fitted  
985 gamma mixture model (2 gamma distribution), and parameters was trained using EM algorithm  
986 (Dempster, Laird, and Rubin 1979) using mixtools package in R (Benaglia et al. 2009). The  
987 threshold for classifying promoters as broad or narrow was selected by finding the point which  
988 best separates the two distributions. Following this approach, promoters with width above  
989 about 10-15 bp. were classified as broad, which was consistent across all tissues and agreed  
990 with earlier studies (Forrest et al. 2014). To classify promoters into broad/narrow using shape  
991 index, we fitted Gaussian mixture model (2 Gaussian distribution) to the data and selected the  
992 threshold separating the two distributions using the same approach as above. For the  
993 subsequent analysis, we used promoter width feature since it showed more clear bi-modal  
994 distribution in all tissues (example in Supplementary fig 7a-c) and is a more common metrics  
995 in the analysis of mammalian promoters (Forrest et al. 2014; Carninci et al. 2006).

996 Each gene was then assigned the promoter width of its main transcript. If more than one CAGE  
997 cluster was present for a gene's main transcript, the cluster with the highest normalized CAGE  
998 signal was selected. Promoter width values for most of the genes were highly correlated across  
999 tissues (Supplementary fig 7d). Based on the tissue-specific shape data, we calculated two  
1000 aggregated features for each gene. Mean promoter width (mean\_width feature) was calculated  
1001 as the mean of gene promoter widths in all tissues where it had CAGE signal (passing the  
1002 filtering criteria defined above). Share of tissues where a gene had broad promoter  
1003 (percentage\_of\_broad feature) was calculated for each gene by dividing the number of tissues

1004 where the gene had broad promoter by the total number of tissues where the gene had CAGE  
1005 signal.

1006 **TATA-box motif.** TATA-box motif coordinates were obtained from the PWMTools web server  
1007 (Ambrosini, Groux, and Bucher 2018): JASPAR core 2018 vertebrates motif library (Khan et  
1008 al. 2018), p-value cutoff of  $10^{-4}$ , GRCh37/hg19 genome assembly). Motif coordinates were  
1009 overlapped with gene core promoter regions (-300/+200 bp), and number of overlaps for each  
1010 gene was recorded (TATA\_box feature).

1011 **Transcription Factors.** Transcription factors dataset (444 TFs, peaks with motifs, hg19  
1012 genome) were obtained from (Vorontsov et al. 2018). If several datasets were available for the  
1013 same TF, the dataset with the best quality was selected. For each TF, the corresponding feature  
1014 was calculated by overlapping the TF regions and gene TSS-proximal regions (-500/+500 bp)  
1015 and counting the number of overlaps for each gene.

1016 **Chromatin States.** Chromatin States dataset (chromHMM core 15-state model with 5 marks  
1017 and 127 epigenomes (Ernst and Kellis 2017)) was downloaded from Epigenomics Roadmap  
1018 project ([https://egg2.wustl.edu/roadmap/web\\_portal/chr\\_state\\_learning.html](https://egg2.wustl.edu/roadmap/web_portal/chr_state_learning.html)). We considered  
1019 26 tissues (Supplementary table 12). For each tissue, 15 features (one for each state, e.g. TssA  
1020 or TssBiv) were obtained. Each feature was calculated by overlapping corresponding state  
1021 regions and gene TSS-proximal regions (-500/+500 bp) and counting the number of overlaps  
1022 for each region. Finally, aggregated features (e.g. mean\_TssA or mean\_TssBiv ) were  
1023 calculated as the mean of feature values for each state over all 26 tissues.

1024 **CpG Islands.** CpG islands (CGI) data for hg19 were downloaded from the UCSC Genome  
1025 browser (Haeussler et al. 2019). For each CGI, these included CGI length (CpG\_Length),  
1026 number of CpG clusters (CpGNum) and number of GC dinucleotides (gcNum). The three  
1027 corresponding features for each gene were calculated by overlapping CGI regions and gene  
1028 core promoter regions (-300/+200 bp). When a gene did not overlap any CGI, the three features

1029 were assigned to 0. If multiple overlaps were present, CGI with the biggest overlap was  
1030 considered for each gene.

1031 **Promoter GC-Content.** Promoter GC-content (GC\_content) was calculated by using biostring  
1032 package (Pagès H et al 2019) and BSgenome.Hsapiens.UCSC.hg19 v1.4.0 in R in gene core  
1033 promoter regions (-300/+200 bp).

1034 **Compiling final feature tables.** We collated three tissue-specific datasets for lung, muscle, and  
1035 ovary by combining the above promoter features and tissue-specific expression data  
1036 (Supplementary tables 13-15). These tables included three types of features:

- 1037 - Tissue-specific features (promoter width and chromatin states);
- 1038 - Features aggregated across tissues (mean promoter width, percentage of broad,  
1039 mean chromatin states – see above);
- 1040 - Non tissue-specific features (all other features, e.g. TATA-box or TF peaks)

1041 These tables included genes that were expressed and had CAGE signal (passing the above  
1042 filtering criteria in both datasets) in the corresponding tissues. For muscle tissue, ‘Skeletal  
1043 muscle male’ dataset was used for tissue-specific chromatin states. The fourth feature table  
1044 included only non-tissue-specific and aggregated features along with mean expression level  
1045 and variation (Supplementary table 16). This table was comprised of genes that were expressed  
1046 and had CAGE signal in a least one of the analysed tissues. Expression variation was adjusted  
1047 for the expression level on these final sets of genes in each table (see above).

1048 **Essential genes, drug targets, and GWAS catalogue.** Essential genes (essential in multiple  
1049 cultured cell lines based on CRISPR/Cas screens (Hart et al. 2017)) and drug targets (FDA-  
1050 approved drug targets (Wishart et al. 2018) and drug targets according from (Nelson et al.  
1051 2015)) were downloaded from Macarthur lab repository ([https://github.com/macarthur-](https://github.com/macarthur-lab/gene_lists)  
1052 [lab/gene\\_lists](https://github.com/macarthur-lab/gene_lists)). GWAS dataset was downloaded from EBI GWAS catalog (Buniello et al.

1053 2019). Genes with GWAS associations within upstream regions or downstream regions were  
1054 considered. These gene annotations were used in Fig. 6f and Supplementary fig. 8c, but not  
1055 included in prediction models. Information on these gene types is provided in Supplementary  
1056 table 9.

1057

## 1058 **Predicting expression level and variation**

### 1059 *Random forest models for Drosophila embryos*

1060 Feature selection was done with the Boruta algorithm implemented in R (Kursa and Rudnicki  
1061 2010) with the following parameters: p-value = 0.01, maxRuns = 500; Z-scores of mean  
1062 decrease accuracy measure as importance attribute; ranger implementation of random forest  
1063 regression. Feature selection was done separately for several tasks: (1) predicting expression  
1064 variation; (2) predicting expression level (log-transformed values); (3) predicting promoter  
1065 shape index; (4-5) predicting expression variation and level in broad and narrow promoter  
1066 genes separately. Median feature importance from 500 iterations were used as feature  
1067 importance metrics. All features selected in at least one of the 5 setting listed above are  
1068 provided in Supplementary table 5 with the corresponding importance. Only selected features  
1069 were used in random forest predictions and all downstream analysis.

1070 For each explained variable (expression variation, level or promoter shape index), we ran  
1071 random forest regressions using mlr package in R (Bischl et al. 2016) with ranger  
1072 implementation of random forest (Wright and Ziegler 2015); default parameters: num.trees =  
1073 500, mtry = square root of the number variables). Model performance was reported with  
1074 coefficient of determination (R<sup>2</sup>) based on five-fold cross validation (Fig 1d).

### 1075 *Random forest models for human tissues*

1076 As above, we used random forest regression to predict expression level and variation in three  
1077 tissues (lung, ovary, and muscle), as well as mean expression level and variation. Feature  
1078 selection and random forest regression were performed in the same way and with the same  
1079 parameters as for *Drosophila* dataset. Boruta feature selection algorithm was used to select  
1080 important features predictive of expression level (log-transformed) and expression variation in  
1081 each of the four datasets (three tissues and average). Feature importance scores are reported in  
1082 Supplementary Table 17. Random forest regressions were run on the sets of selected features  
1083 for the corresponding datasets. Model performance was reported with coefficient of  
1084 determination (R<sup>2</sup>) based on five-fold cross validation (Fig 6a for performance in all 4  
1085 datasets).

1086

## 1087 **Testing robustness of the random forest models**

### 1088 ***Robustness tests for Drosophila dataset***

1089 We have run the following models to test robustness of our predictions to various potential  
1090 confounding factors:

- 1091 1. Binning genes by their median expression level into 5 quantiles and rerunning  
1092 variation prediction for each quantile separately (Fig 1e);
- 1093 2. Predicting alternative variation measures (see above): resid\_sd, resid\_mad,  
1094 resid\_iqr, and sd\_vst (Supplementary Fig 2c);
- 1095 3. Binning genes by their median expression change between 10-12 and 6-8 hours  
1096 after fertilization into 5 quantiles and rerunning variation prediction for each quantile  
1097 separately (Supplementary Fig 2d);
- 1098 4. Binning genes by their promoter shape index into 4 quartiles and rerunning  
1099 variation prediction for each quartile separately (Fig 3b).



1100 5. Training and predicting on different chromosomes (or chromosome arms), e.g.  
1101 leaving out all genes on chr3L for testing the model trained on all other genes  
1102 (Supplementary Fig 2e).

1103 For these tests, random forest regressions were run with the same parameters as above and on  
1104 the set of features selected for the variation prediction on the full set of genes. Performance of  
1105 the models measured with  $R^2$  on the five-fold cross-validation in 1-4 and on holdout  
1106 chromosome (arm) in 5.

### 1107 ***Robustness tests on human datasets***

1108 Since human gene expression datasets from GTEx project contain high sample heterogeneity  
1109 (different ages, sexes, reasons of death etc), we have rerun prediction models on the following  
1110 subsets of individuals (using samples metadata from GTEx website) for the lung tissue  
1111 expression dataset:

- 1112 - Only 20-39 year old individuals;
- 1113 - Only 40-59 year old individuals;
- 1114 - Only 60-79 year old individuals;
- 1115 - Only males;
- 1116 - Only females
- 1117 - Only violence group (as the reason of death);
- 1118 - Only non-violence group (as the reason of death)

1119 Gene expression variation and level were recalculated on the corresponding subsets of samples  
1120 using the same methodology as above. Random forest regressions were rerun with the same  
1121 parameters as above and on the set of features selected for the variation prediction on the full  
1122 set of samples. Performance of the models was measured with  $R^2$  on the five-fold cross-  
1123 validation (Supplementary fig. 8a).

1124

## 1125 **Predicting differential expression in *Drosophila***

1126 Lists of differentially expressed genes were obtained from (Moskalev et al. 2015). All  
1127 experiments were conducted in adult *Drosophila melanogaster* flies (five-day old males) and  
1128 included the following stress condition: entomopathogenic fungus infection (10 CFU, 10  
1129 CFU), ionizing radiation (144 Gy, 360 Gy, 864 Gy), starvation (16 h), and cold shock (+4°C,  
1130 0°C, -4°C). In total, 1356 out of our final set of 4074 genes were detected as differentially  
1131 expressed in at least one of the above stress conditions (DE) versus 2718 non-DE genes.

1132 To test how well model trained on expression variation can predict differential expression, we  
1133 reformulated variation prediction into classification task to predict top-30% (class = 1) vs.  
1134 bottom-30% (class = -1) of genes ranked by their expression variation (our embryonic dataset)  
1135 and used trained model to predict DE (class = 1) versus non-DE genes (class = -1). To avoid  
1136 having same genes in test and train sets, we undertook the following approach. Randomly  
1137 sampled 50% of DE genes (678) and sample number of non-DE genes were set aside for train  
1138 set. From the remaining genes (after excluding test set - either all 2718 genes, or only genes  
1139 with narrow promoters), top-30% and bottom-30% of genes ranked by expression variation  
1140 were used for training. Model was trained on the test set using random forest classification with  
1141 default parameters (mlr package; ranger implementation of random forest; default parameters:  
1142 num.trees = 500, mtry = square root of the number variables). Training was performed on the  
1143 features important for predicting expression variation on the full set of genes (see above,  
1144 Supplementary table 4) for expression variation (1 for high-variable, -1 for low-variable).  
1145 Testing was done on the same set of features for differential expression (1 for DE, -1 for non-  
1146 DE). Performance on the test set was assessed by Area Under the ROC curve (AUC). 10 rounds  
1147 of random sampling of genes were performed, and mean AUC was reported (Fig 5d).

1148

## 1149 **Predicting differential expression prior in human**

1150 Differential expression Prior data (DE Prior rank) was obtained from (Crow et al. 2019).

1151 Ensembl ids were converted to entrez ids by using BioMart package in R (Durinck et al. 2009).

1152 We had information on both DE prior and mean variation (average of 43 tissue-specific

1153 variations across individuals, see above) for 11312 human genes. As above, we reformulated

1154 variation prediction into classification task to predict top-30% (class = 1) vs. bottom-30% (class

1155 = -1) of genes ranked by their expression variation and used trained model to predict top-30%

1156 (class = 1) versus bottom-30% (class = -1) genes ranked by DE prior. Training and testing were

1157 performed on the set of features predictive of mean expression variation in the main dataset

1158 (Supplementary table 17). Training and testing were done on the non-overlapping sets of genes

1159 using the following approach. First, we defined top-prior (top-30% by DE prior) and bottom-

1160 prior genes (bottom-30% by DE prior). 50% of genes from both groups were randomly sampled

1161 and assigned to test set. From the remaining genes, top-30% and bottom-30% by mean

1162 expression variation were selected for train set. The model was trained on the test set to classify

1163 top versus bottom variable genes (random forest classification with default parameters; mlr

1164 package in R, ranger implementation of random forest). Trained model was then used on the

1165 test set to predict top versus bottom DE prior genes. Similarly, another model was both trained

1166 and tested on classifying top versus bottom DE prior genes on the same train and test sets,

1167 respectively. Performance of the models on the test set was assessed by Area Under the ROC

1168 curve (AUC). 10 rounds of random sampling of genes were performed, and mean AUC was

1169 reported (Fig 6d).

1170

## 1171 **Statistical data analysis and visualization**

1172 Data analysis in R was done using base, stats, MASS, rcompanion, psych, tidyverse, magrittr,  
1173 data.table, ltm, yaml, Boruta, mlr, ranger, GenomicRanges, DEseq2, CAGEr, and rtracklayer  
1174 packages. All plots were done in R using ggplot2, ggpubr, gridExtra, ggExtra, RColorBrewer  
1175 and pheatmap libraries. Contour lines in in Fig 2b-e represent 2D kernel density estimations  
1176 (geom\_density\_2d with default parameters). P-values on the plots (Fig 2 b-e, Fig 4a-c, Fig 5b-  
1177 c, Fig 6c,e,f) come from Wilcoxon rank test. Whiskers on the plots (Fig 1c-e, Fig 2f, Fig 3b,  
1178 Fig 6a) indicate one standard deviation around the mean.

1179 **Correlation analysis.** Generally, we used Spearman coefficient of correlation (R base) for  
1180 comparing pairs of continuous variables or discrete variables taking more than two values (e.g.  
1181 expression variation and promoter shape index or expression variation and conservation rank).  
1182 In some cases, we used Spearman correlation coefficient (R base) to compare variables that are  
1183 on the same scale, e.g. expression variations at different-time-points or for neighboring genes  
1184 (same for comparing expression levels). Finally, point-biserial correlation coefficient (R, ltm  
1185 library) was computed between continuous and binary variables (e.g. expression variation and  
1186 presence of TATA-box motif). Median expression levels were log-transformed before  
1187 computing correlation.

1188 **Gene Ontology enrichments.** Gene Ontology (GO) enrichment tests were performed using  
1189 clusterProfiler package in R (Yu et al. 2012). We used compareCluster function (p-value cut-  
1190 off=0.01) to find enriched biological processes (Fig. 3c) and molecular functions  
1191 (Supplementary fig. 3a) in genes grouped by their promoter shape and expression variation.  
1192 For this analysis, genes with broad and narrow promoters were separately split into four  
1193 quantiles by their expression variation (1-4 x-axis labels in Fig. 3c and Supplementary fig. 3a  
1194 indicate quantiles: from low to high variation). Quantile intervals for broad promoter genes (1  
1195 to 4): [-1.06,-0.444]; (-0.444,-0.266]; (-0.266,-0.0754]; (-0.0754,1.89]. Quantile intervals for

1196 narrow promoter genes (1 to 4): [-0.98,-0.173]; (-0.173,0.0751]; (0.0751,0.416]; (0.416,1.99].

1197 Full results of GO enrichment tests are provided in Supplementary tables 5 and 6.

1198 **Fisher's tests.** We used Fisher's exact test (R base package) to find enrichments of features in  
1199 different gene groups in *Drosophila* dataset (broad, narrow-low, narrow-high). All tests were  
1200 done for 2x2 contingency tables, and odds ratios and p-values provided by the test were  
1201 recorded. We used Benjamini-Hochberg correction to adjust p-values for the multiple testing.  
1202 We used adjusted p-value threshold of 0.01 and odds ratio above 2 to define significantly  
1203 enriched features (p-value adjusted < 0.01; odds ratio < 0.5 for significantly depleted).

1204 First, we tested enrichment of housekeeping genes, transcription factors and TATA-box  
1205 promoter motifs in the following pairwise comparisons: (1) broad vs. narrow, (2) narrow-low  
1206 vs. two other groups, (3) narrow-high vs. two other groups. P-values were corrected for the  
1207 number of tests (9 comparisons).

1208 Next, we tested enrichments of ChIP-seq peaks of 24 transcription factors in the TSS-proximal  
1209 regions in the same comparisons as above. 25 TSS-proximal TF features selected by Boruta  
1210 algorithm, including two ChIP-seqs for Trl (in embryos at 8-16 and 16-24 hours after  
1211 fertilization) from which the one with the overlapping time window was used (8-16h). Since  
1212 ChIP-seq peaks were first overlapped with DHS peaks before assigning to genes (see Features  
1213 section above), we restricted the analysis of TF enrichments to the genes that have at least one  
1214 DHS peak in their TSS-proximal regions. P-values were corrected for 72 comparisons (24\*2).  
1215 Log<sub>2</sub>-transformed odds ratios from these tests are shown in Fig. 4c, weak  
1216 enrichments/depletions (odds ratios above 0.5 and below 2) are shown in grey, actual values  
1217 are provided in Supplementary table 5.

1218 Peaks of Trl and Jarid2 (enriched in narrow-low) also showed weak enrichments in narrow-  
1219 high, which likely comes from strong depletion of these TFs at the TSSs of broad promoter

1220 genes. To control for that, we also tested enrichments of the same 24 TF peaks in three  
 1221 comparisons between gene groups: (1) broad vs. narrow-low, (2) broad vs. narrow-high, (3)  
 1222 narrow-low vs. narrow high (also 72 comparisons for p-values correction).

1223 Results from all Fisher's tests described above are provided in Supplementary table 5.

1224

1225

1226 **Table 1. Summary of features in *Drosophila* table by class.** Description of features and  
 1227 sources are provided in methods.

|                     |                                                                                                                                                                                                                                                                                                                                                                                                                                                      |
|---------------------|------------------------------------------------------------------------------------------------------------------------------------------------------------------------------------------------------------------------------------------------------------------------------------------------------------------------------------------------------------------------------------------------------------------------------------------------------|
| <b>Gene body</b>    | gene length, number of transcripts, number of exons, gene GC content                                                                                                                                                                                                                                                                                                                                                                                 |
| <b>Gene context</b> | Insulation score, TAD size, distance to TAD borders, gene density, chromosome                                                                                                                                                                                                                                                                                                                                                                        |
| <b>Gene type</b>    | maternal genes, transcription factor, housekeeping genes, ubiquitously expressed genes, genes conserved in human                                                                                                                                                                                                                                                                                                                                     |
| <b>Genetics</b>     | Share of genetic variance in cis, presence of expression QTL, 3'UTR sequence variation index                                                                                                                                                                                                                                                                                                                                                         |
| <b>TSS</b>          | 8 core promoter motifs (TATA-box, Inr, Motif1, Motif6, Motif7, DRE, DPE, MTE), TSS GC-content, promoter shape, Polymerase II pausing index, DHS features (number of DHS peaks, number of conditions with DHS, DHS time and tissue profile, presence of ubiquitous DHS), TF features (280 features indicating presence of peaks and/or motifs of various DNA-binding proteins, total number of TF peaks and motifs in TSS-proximal region), annotated |

|                          |                                                                                                                                                                                                                                                                                                                                                                                            |
|--------------------------|--------------------------------------------------------------------------------------------------------------------------------------------------------------------------------------------------------------------------------------------------------------------------------------------------------------------------------------------------------------------------------------------|
|                          | enhancers (CAD4 and Vienna sets; heart and mesoderm CRM sets),<br>5 chromatin colors                                                                                                                                                                                                                                                                                                       |
| <b>Distal regulators</b> | DHS features (number of DHS peaks, number of conditions with DHS, DHS time and tissue profile, presence of ubiquitous DHS), TF features (280 features indicating presence of peaks and/or motifs of various DNA-binding proteins, total number of TF peaks and motifs in TSS-proximal region), annotated enhancers (CAD4 and Vienna sets; heart and mesoderm CRM sets), 5 chromatin colors |
| <b>3'UTR</b>             | Presence of motifs for 466 miRNAs and 54 RNA-binding proteins (RBP), total number of miRNA and RBPs, relative 3'UTR length, 3'UTR length log2 fold change across time-points (10-12h vs 2-4h; 10-12h vs. 6-8h; 6-8h vs. 2-4h), targets of Smaug and Pumilio (embryonic and adult) RNA-binding proteins                                                                                     |

1228

## 1229 **Figure Legends**

1230 **Figure 1. Genomic features can predict expression variation independent of expression**  
1231 **levels. (A)** Differences of gene regulatory mechanisms related to noise amplification and noise  
1232 buffering would result in different observed expression variation given the same variation  
1233 sources (left). **(B)** Dependence between coefficient of variation (CV) and median expression  
1234 level of 4074 genes across 75 samples (left). Residuals from LOESS regression of CV on the  
1235 median were used as the measure of variation throughout the analysis (right). Median  
1236 expression level and coefficient of variation plotted on log<sub>2</sub>-scale, red line represents LOESS  
1237 regression fit. **(C)** Correlation of expression variation calculated from subsets of samples  
1238 versus the full data set. Error bars = standard deviation across 100 independent selections of  
1239 samples. **(D)** Schematic overview of the random forest models and feature selection with  
1240 Boruta algorithm (left). Performance shown as R<sup>2</sup> from 5-fold cross-validation and compared  
1241 to randomly permuted data (right). Whiskers = standard deviation across the 5-fold cross  
1242 validation. **(E)** Performance (R<sup>2</sup>, 5-fold cross validation) for genes grouped by expression  
1243 levels (quantiles). Whiskers represent standard deviation from 5-fold cross validation, number  
1244 of genes per quantile indicated (x-axis). Red dotted line indicates performance of full model.

1245

1246 **Figure 2. Promoter architecture is the most important predictor of expression variation**  
1247 **(A)** Top-30 important features for predicting expression variation using Boruta feature  
1248 selection. Features are ordered by their importance for expression variation (blue) and show  
1249 the corresponding importance for level (orange). The absolute value and sign of correlation  
1250 coefficient is indicated by the triangle size and orientation, respectively. For binary features,  
1251 phi coefficient of correlation was used, otherwise Spearman coefficient of correlation. Label  
1252 colors correspond to feature groups in (F). **(B-E)** Relationship between expression level and  
1253 expression variation shown as 2D kernel density contours (left) and boxplots (right) for  
1254 housekeeping genes **(B)**, genes separated by promoter shape **(C)**, number of embryonic  
1255 conditions with a DHS **(D)**, and presence of TATA-box at TSS **(E)**. LOESS regression lines  
1256 indicated for each gene group, P-values from Wilcoxon test. **(F)** Performance of random forest  
1257 predictions (mean R<sup>2</sup> from 5-fold cross-validation) for expression level (orange) and variation  
1258 (blue) trained on individual feature groups. Whiskers = standard deviation, color code of y-  
1259 axis labels matches Fig 2A.



1260 **Figure 3. Expression variation in broad versus narrow promoter genes reflects trade-offs**  
1261 **between expression robustness and regulatory plasticity. (A)** Genes separate into three  
1262 groups based on their promoter shape index (x-axis) and expression variation (y-axis). Each  
1263 dot represents a gene; colors indicate gene annotations: housekeeping (orange), non-  
1264 housekeeping TFs (blue), non-housekeeping with a TATA-box (red), other (grey).  
1265 Distributions of promoter shape index and expression variation across gene groups are shown  
1266 as density plots. Broad and narrow promoter genes are separated based on shape index  
1267 threshold of -1 (vertical black line) as in (Schor et al. 2017). Narrow-low and narrow-high  
1268 groups are separated based on the median expression variation of narrow promoter genes  
1269 (horizontal black line). **(B)** Performance to predict expression variation for genes split by  
1270 quartiles of promoter shape index. Horizontal lines show performance (mean  $R^2$  from 5-fold  
1271 cross-validation) on broad (orange) and narrow (blue) promoter genes separately. Whiskers =  
1272 standard deviation (from 5-fold cross validation), number of genes per categories indicated (x-  
1273 axis). **(C)** GO term enrichment (Biological Process) of genes stratified by promoter shape and  
1274 expression variation. Top GO terms are shown (full list in Supplementary Table 6. Quartiles  
1275 of expression variation (1- lowest, 4 – highest) were calculated for broad and narrow promoter  
1276 genes separately. Quantile intervals for broad and narrow promoter genes provided in methods.

1277

1278 **Figure 4. Different regulatory mechanisms lead to expression robustness in genes with**  
1279 **broad and narrow promoters. (A,B)** Chromatin accessibility (number of conditions with  
1280 DHS) **(A)**, or number of different TF peaks **(B)** overlapping TSS-proximal DHS for genes  
1281 stratified into broad, narrow-low and narrow-high (defined in Fig 3A). P-values from Wilcoxon  
1282 test. **(C)** Top: enrichment (odds ratio from Fisher's test) of ChIP peaks for 24 TFs in TSS-  
1283 proximal DHSs of broad, narrow-low and narrow-high genes. Only TFs with predictive  
1284 importance for expression variation (based on Boruta) were included. For each TF, Fisher's  
1285 test was performed separately for each category vs all other. Color =  $\log_2$  odds ratio from  
1286 Fisher's exact test (two-sided), grey = non-significant comparisons (adjusted p-value cutoff of  
1287 0.01, Benjamini-Hochberg correction on all 24x3 comparisons). Lower panels: Presence of  
1288 BEAF-32 (left) and Trl (right) ChIP-seq peaks in TSS-proximal DHS, plotted coordinates of  
1289 promoter shape index and expression variation (same as Fig. 3a). Each dot represents a gene  
1290 (grey if TF peak is absent, blue for Trl, orange for BEAF-32). **(D-F)** Relationship between  
1291 polymerase pausing index **(D)**, number of miRNA motifs in 3'UTR of a gene **(E)** and number  
1292 of TSS-distal DHS peaks **(F)** and expression variation for broad (orange) and narrow (blue)  
1293 promoter genes. Each dot represents a gene, lines linear regression fits,  $\rho$ =Spearman  
1294 correlation coefficient. **(G)** Gene scores by two indices constructed as the normalized rank  
1295 average of: number of embryonic conditions with DHS, number of TF peaks, number of TF  
1296 motifs (Broad regulatory index; left), and number of TSS-distal DHS, number of miRNA  
1297 motifs, Pol II pausing index (Narrow regulatory index; right). Colors correspond to broad  
1298 (orange), narrow-low (blue) and narrow-high (red)) gene groups. P-values < 1e-09 for all  
1299 pairwise comparisons of the distributions.

1300

1301 **Figure 5. Expression variation can predict signatures of differentially expression upon**  
1302 **stress. (A)** Expression variation of genes differentially expressed (DE) upon any stress  
1303 conditions from (Moskalev et al. 2015) compared to non-differentially expressed genes (non-  
1304 DE). **(B-C)** Differences in scores by the regulatory complexity indices (from Fig. 4g) between  
1305 DE and non-DE genes (from Fig. 6a): 'broad' complexity index **(B)**, 'narrow' complexity index  
1306 **(C)**, P-values from Wilcoxon rank test. **(D)** ROC-curves for predicting DE with random forest  
1307 models trained on expression variation (top-30% variable vs. bottom-30% variable) in all genes

1308 (light blue) or narrow promoter genes (dark blue). Models were trained and tested on non-  
1309 overlapping subsets of genes in 10 random sampling rounds (all plotted). Median AUC values  
1310 from 10 sampling rounds.

1311

1312 **Figure 6.** Features in human promoters predict both expression variation and differential  
1313 expression. **(A)** Performance of random forest predictions (mean  $R^2$  from 5-fold cross-  
1314 validation, whiskers = standard deviation) for expression level (orange) and variation (blue)  
1315 trained on expression variation in tissue-specific RNA-seq (lung, ovary, and muscle), as well  
1316 as mean variation across 43 tissues (Methods). **(B)** Top-20 features for predicting expression  
1317 variation using Boruta feature selection. Features ordered by their importance for expression  
1318 variation (blue), showing the corresponding importance for level (orange). Shapes indicate four  
1319 different datasets (three tissues and mean variation). **(C,E)** Differences in expression variation  
1320 (C) and DE prior (E) for some of the top-predictive features from (B). P-values = Wilcoxon  
1321 test, number of genes indicated. ‘Share TssBiv > 0’ indicates genes that have “TSS bivalent”  
1322 chromatin state (chomHMM, Methods) in at least one tissue. ‘Share broad > 0.8’ indicates  
1323 genes which have broad promoter in at least 80% of tissues where it is expressed (Methods).  
1324 **(D)** ROC-curves for predicting DE prior (top-30% variable vs. bottom-30%) with random  
1325 forest models trained on DE prior (light blue) and mean expression variation (dark blue).  
1326 Models trained and tested on non-overlapping subsets of genes in 10 random sampling rounds  
1327 (all plotted), with median AUC values indicated. **(F)** Mean expression variation of specific  
1328 genes groups (GWAS hits, essential genes, drug targets) compared to the distribution of mean  
1329 expression variation for all genes in the dataset.

## 1330 References

- 1331 Alemu, Elfalem Y, Joseph W Carl Jr, Héctor, Corrada Bravo, and Sridhar Hannenhalli. 2014.  
1332 “Determinants of Expression Variability.” <https://doi.org/10.1093/nar/gkt1364>.
- 1333 Ambrosini, Giovanna, Romain Groux, and Philipp Bucher. 2018. “PWMScan: A Fast Tool for  
1334 Scanning Entire Genomes with a Position-Specific Weight Matrix.” *Bioinformatics*  
1335 (*Oxford, England*) 34 (14): 2483–84. <https://doi.org/10.1093/bioinformatics/bty127>.
- 1336 Anders, Simon, and Wolfgang Huber. 2010. “Differential Expression Analysis for Sequence  
1337 Count Data.” *Genome Biology* 11 (10): R106. [https://doi.org/10.1186/gb-2010-11-10-](https://doi.org/10.1186/gb-2010-11-10-r106)  
1338 [r106](https://doi.org/10.1186/gb-2010-11-10-r106).
- 1339 Anders, Simon, Paul Theodor Pyl, and Wolfgang Huber. 2015. “HTSeq-A Python Framework  
1340 to Work with High-Throughput Sequencing Data.” *Bioinformatics* 31 (2): 166–69.  
1341 <https://doi.org/10.1093/bioinformatics/btu638>.
- 1342 Arnold, Cosmas D, Muhammad A Zabidi, Michaela Pagani, Martina Rath, Katharina  
1343 Schernhuber, Tomáš Kazmar, and Alexander Stark. 2016. “Genome-Wide Assessment of  
1344 Sequence-Intrinsic Enhancer Responsiveness at Single-Base-Pair Resolution.” *Nature*  
1345 *Biotechnology* 35 (2): 136–44. <https://doi.org/10.1038/nbt.3739>.
- 1346 Bailey, Timothy L, Mikael Boden, Fabian A Buske, Martin Frith, Charles E Grant, Luca  
1347 Clementi, Jingyuan Ren, Wilfred W Li, and William S Noble. 2009. “MEME SUITE:  
1348 Tools for Motif Discovery and Searching.” *Nucleic Acids Research* 37 (Web Server  
1349 issue): W202-8. <https://doi.org/10.1093/nar/gkp335>.
- 1350 Balwierz, Piotr J., Piero Carninci, Carsten O. Daub, Jun Kawai, Yoshihide Hayashizaki,  
1351 Werner Van Belle, Christian Beisel, and Erik van Nimwegen. 2009. “Methods for  
1352 Analyzing Deep Sequencing Expression Data: Constructing the Human and Mouse  
1353 Promoterome with DeepCAGE Data.” *Genome Biology* 10 (7).  
1354 <https://doi.org/10.1186/gb-2009-10-7-r79>.
- 1355 Batada, Nizar N, and Laurence D Hurst. 2007. “Evolution of Chromosome Organization  
1356 Driven by Selection for Reduced Gene Expression Noise.” *Nature Genetics* 39 (8): 945–  
1357 49. <https://doi.org/10.1038/ng2071>.
- 1358 Battich, Nico, Thomas Stoeger, and Lucas Pelkmans. 2015. “Control of Transcript Variability  
1359 in Single Mammalian Cells.” *Cell* 163: 1596–1610.  
1360 <https://doi.org/10.1016/j.cell.2015.11.018>.
- 1361 Becskei, Attila, Benjamin B Kaufmann, and Alexander van Oudenaarden. 2005.  
1362 “Contributions of Low Molecule Number and Chromosomal Positioning to Stochastic  
1363 Gene Expression.” *Nature Genetics* 37 (9): 937–44. <https://doi.org/10.1038/ng1616>.
- 1364 Benaglia, Tatiana, Didier Chauveau, David R. Hunter, and Derek S. Young. 2009. “Mixtools:  
1365 An R Package for Analyzing Finite Mixture Models.” *Journal of Statistical Software* 32  
1366 (6): 1–29. <https://doi.org/10.18637/jss.v032.i06>.
- 1367 Bischl, Bernd, Michel Lang, Lars Kotthoff, Julia Schiffner, Jakob Richter, Erich Studerus,  
1368 Giuseppe Casalicchio, and Zachary M. Jones. 2016. “Mlr: Machine Learning in R.”  
1369 *Journal of Machine Learning Research* 17 (170): 1–5. [http://jmlr.org/papers/v17/15-](http://jmlr.org/papers/v17/15-066.html)  
1370 [066.html](http://jmlr.org/papers/v17/15-066.html).
- 1371 Blake, William J, Gábor, Balázs, Michael A Kohanski, Farren J Isaacs, Kevin F Murphy,  
1372 Yina Kuang, Charles R Cantor, David R Walt, and James J Collins. 2006. “Phenotypic

- 1373 Consequences of Promoter-Mediated Transcriptional Noise.” *Molecular Cell* 24: 853–65.  
1374 <https://doi.org/10.1016/j.molcel.2006.11.003>.
- 1375 Boettiger, Alistair N, and Michael Levine. 2009. “Synchronous and Stochastic Patterns of Gene  
1376 Activation in the Drosophila Embryo.” <https://doi.org/10.1126/science.1173976>.
- 1377 Bolger, Anthony M., Marc Lohse, and Bjoern Usadel. 2014. “Trimmomatic: A Flexible  
1378 Trimmer for Illumina Sequence Data.” *Bioinformatics* 30 (15): 2114–20.  
1379 <https://doi.org/10.1093/bioinformatics/btu170>.
- 1380 Buniello, Annalisa, Jacqueline A.L. Macarthur, Maria Cerezo, Laura W. Harris, James  
1381 Hayhurst, Cinzia Malangone, Aoife McMahon, et al. 2019. “The NHGRI-EBI GWAS  
1382 Catalog of Published Genome-Wide Association Studies, Targeted Arrays and Summary  
1383 Statistics 2019.” *Nucleic Acids Research* 47 (D1): D1005–12.  
1384 <https://doi.org/10.1093/nar/gky1120>.
- 1385 Cannavò, Enrico, Nils Koelling, Dermot Harnett, David Garfield, Francesco P Casale, Lucia  
1386 Ciglar, Hilary E Gustafson, et al. 2016. “Genetic Variants Regulating Expression Levels  
1387 and Isoform Diversity during Embryogenesis.” *Nature*.  
1388 <https://doi.org/10.1038/nature20802>.
- 1389 Carey, Lucas B., David van Dijk, Peter M. A. Sloom, Jaap A. Kaandorp, and Eran Segal. 2013.  
1390 “Promoter Sequence Determines the Relationship between Expression Level and Noise.”  
1391 Edited by Robert Singer. *PLoS Biology* 11 (4): e1001528.  
1392 <https://doi.org/10.1371/journal.pbio.1001528>.
- 1393 Carninci, Piero, Albin Sandelin, Boris Lenhard, Shintaro Katayama, Kazuro Shimokawa,  
1394 Jasmina Ponjavic, Colin A M Semple, et al. 2006. “Genome-Wide Analysis of  
1395 Mammalian Promoter Architecture and Evolution.” *Nature Genetics* 38 (6): 626–35.  
1396 <https://doi.org/10.1038/ng1789>.
- 1397 Chen, Linan, Jason G Dumelie, Xiao Li, Matthew Hk Cheng, Zhiyong Yang, John D Laver,  
1398 Najeeb U Siddiqui, et al. 2014. “Global Regulation of mRNA Translation and Stability in  
1399 the Early Drosophila Embryo by the Smaug RNA-Binding Protein.”  
1400 <https://www.ncbi.nlm.nih.gov/pmc/articles/PMC4053848/pdf/gb-2014-15-1-r4.pdf>.
- 1401 Ciliberti, Stefano, Olivier C. Martin, Andreas Wagner, O Tenailon, and PE Turner. 2007.  
1402 “Robustness Can Evolve Gradually in Complex Regulatory Gene Networks with Varying  
1403 Topology.” *PLoS Computational Biology* 3 (2): e15.  
1404 <https://doi.org/10.1371/journal.pcbi.0030015>.
- 1405 Crow, Megan, Nathaniel Lim, Sara Ballouz, Paul Pavlidis, and Jesse Gillis. 2019.  
1406 “Predictability of Human Differential Gene Expression” 116 (13).  
1407 <https://doi.org/10.1073/pnas.1802973116>.
- 1408 Cunningham, Fiona, Premanand Achuthan, Wasiru Akanni, James Allen, M. Ridwan Amode,  
1409 Irina M. Armean, Ruth Bennett, et al. 2019. “Ensembl 2019.” *Nucleic Acids Research* 47  
1410 (D1): D745–51. <https://doi.org/10.1093/nar/gky1113>.
- 1411 Dempster, A. P.; N. M.; Laird, and D.B. Rubin. 1979. “Maximum Likelihood from  
1412 Incomplete Data via the EM Algorithm A.” *Journal of Applied Mechanics, Transactions*  
1413 *ASME* 46 (1): 139–44. <https://doi.org/10.1115/1.3424485>.
- 1414 Dong, Dong, Xiaojian Shao, Naiyang Deng, and Zhaolei Zhang. 2011. “Gene Expression  
1415 Variations Are Predictive for Stochastic Noise.” *Nucleic Acids Research* 39 (2): 403–13.  
1416 <https://doi.org/10.1093/nar/gkq844>.

- 1417 Durinck, Steffen, Paul T Spellman, Ewan Birney, and Wolfgang Huber. 2009. “Mapping  
1418 Identifiers for the Integration of Genomic Datasets with the R/Bioconductor Package  
1419 BiomaRt.” *Nature Protocols* 4 (8): 1184–91. <https://doi.org/10.1038/nprot.2009.97>.
- 1420 Edgar, Bruce A., and Patrick H. O’Farrel. 1989. “Genetic Control of Cell Division Patterns in  
1421 the Drosophila Embryo.” *Cell* 57 (1): 177–87. <https://doi.org/10.1038/jid.2014.371>.
- 1422 Eling, Nils, Michael D. Morgan, and John C. Marioni. 2019. “Challenges in Measuring and  
1423 Understanding Biological Noise.” *Nature Reviews Genetics* 20 (September): 536–48.  
1424 <https://doi.org/10.1038/s41576-019-0130-6>.
- 1425 Eling, Nils, Arianne C. Richard, Sylvia Richardson, John C. Marioni, and Catalina A. Vallejos.  
1426 2018. “Correcting the Mean-Variance Dependency for Differential Variability Testing  
1427 Using Single-Cell RNA Sequencing Data.” *Cell Systems*, August.  
1428 <https://doi.org/10.1016/J.CELS.2018.06.011>.
- 1429 Ernst, Jason, and Manolis Kellis. 2017. “Chromatin-State Discovery and Genome Annotation  
1430 with ChromHMM.” *Nature Protocols* 12 (12): 2478–92.  
1431 <https://doi.org/10.1038/nprot.2017.124>.
- 1432 Faure, Andre J., Jörn M. Schmiedel, and Ben Lehner. 2017. “Systematic Analysis of the  
1433 Determinants of Gene Expression Noise in Embryonic Stem Cells.” *Cell Systems* 5 (5):  
1434 471–484.e4. <https://doi.org/10.1016/J.CELS.2017.10.003>.
- 1435 Félix, Marie-Anne, and Michalis Barkoulas. 2015. “Pervasive Robustness in Biological  
1436 Systems.” *Nature Publishing Group* 16. <https://doi.org/10.1038/nrg3949>.
- 1437 Filion, Guillaume J., Joke G. van Bommel, Ulrich Braunschweig, Wendy Talhout, Jop Kind,  
1438 Lucas D. Ward, Wim Brugman, et al. 2010. “Systematic Protein Location Mapping  
1439 Reveals Five Principal Chromatin Types in Drosophila Cells.” *Cell* 143 (2): 212–24.  
1440 <https://doi.org/10.1016/J.CELL.2010.09.009>.
- 1441 Foreman, Robert, and Roy Wollman. 2019. “Mammalian Gene Expression Variability Is  
1442 Explained by Underlying Cell State.” <https://doi.org/10.1101/626424>.
- 1443 Forrest, Alistair R. R., Hideya Kawaji, Michael Rehli, J. Kenneth Baillie, Michiel J. L. de  
1444 Hoon, Vanja Haberle, Timo Lassmann, et al. 2014. “A Promoter-Level Mammalian  
1445 Expression Atlas.” *Nature* 507 (7493): 462–70. <https://doi.org/10.1038/nature13182>.
- 1446 Fraser, Hunter B, Aaron E Hirsh, Guri Giaever, Jochen Kumm, and Michael B Eisen. 2004.  
1447 “Noise Minimization in Eukaryotic Gene Expression.” Edited by Ken Wolfe. *PLoS*  
1448 *Biology* 2 (6): e137. <https://doi.org/10.1371/journal.pbio.0020137>.
- 1449 Gerber, André P, Stefan Luschnig, Mark A Krasnow, Patrick O Brown, Daniel Herschlag, and  
1450 Christine Guthrie. 2006. “Genome-Wide Identification of MRNAs Associated with the  
1451 Translational Regulator PUMILIO in Drosophila Melanogaster.”  
1452 <https://www.ncbi.nlm.nih.gov/pmc/articles/PMC1400586/pdf/zpq4487.pdf>.
- 1453 GTEx Consortium, The GTEx. 2013. “The Genotype-Tissue Expression (GTEx) Project.”  
1454 *Nature Genetics* 45 (6): 580–85. <https://doi.org/10.1038/ng.2653>.
- 1455 Haberle, Vanja, Alistair R.R. Forrest, Yoshihide Hayashizaki, Piero Carninci, and Boris  
1456 Lenhard. 2015. “CAGEr: Precise TSS Data Retrieval and High-Resolution Promoterome  
1457 Mining for Integrative Analyses.” *Nucleic Acids Research* 43 (8).  
1458 <https://doi.org/10.1093/nar/gkv054>.
- 1459 Haberle, Vanja, and Alexander Stark. 2018. “Eukaryotic Core Promoters and the Functional  
1460 Basis of Transcription Initiation.” *Nature Reviews Molecular Cell Biology*, June, 1.



- 1461 <https://doi.org/10.1038/s41580-018-0028-8>.
- 1462 Haeussler, Maximilian, Ann S. Zweig, Cath Tyner, Matthew L. Speir, Kate R. Rosenbloom,  
1463 Brian J. Raney, Christopher M. Lee, et al. 2019. “The UCSC Genome Browser Database:  
1464 2019 Update.” *Nucleic Acids Research* 47 (D1): D853–58.  
1465 <https://doi.org/10.1093/nar/gky1095>.
- 1466 Hammonds, Ann S, Christopher A Bristow, William W Fisher, Richard Weiszmann, Siqi Wu,  
1467 Volker Hartenstein, Manolis Kellis, Bin Yu, Erwin Frise, and Susan E Celniker. 2013.  
1468 “Spatial Expression of Transcription Factors in Drosophila Embryonic Organ  
1469 Development.” [https://www.ncbi.nlm.nih.gov/pmc/articles/PMC4053779/pdf/gb-2013-  
1470 14-12-r140.pdf](https://www.ncbi.nlm.nih.gov/pmc/articles/PMC4053779/pdf/gb-2013-14-12-r140.pdf).
- 1471 Hart, Traver, Amy Hin Yan Tong, Katie Chan, Jolanda Van Leeuwen, Ashwin Seetharaman,  
1472 Michael Aregger, Megha Chandrashekar, et al. 2017. “Evaluation and Design of  
1473 Genome-Wide CRISPR/SpCas9 Knockout Screens.” *G3: Genes, Genomes, Genetics* 7  
1474 (8): 2719–27. <https://doi.org/10.1534/g3.117.041277>.
- 1475 Hoskins, Roger A, Jane M Landolin, James B Brown, Jeremy E Sandler, Hazuki Takahashi,  
1476 Timo Lassmann, Charles Yu, et al. 2011. “Genome-Wide Analysis of Promoter  
1477 Architecture in Drosophila Melanogaster.” *Genome Research* 21 (2): 182–92.  
1478 <https://doi.org/10.1101/gr.112466.110>.
- 1479 Hu, Yanhui, Ian Flockhart, Arunachalam Vinayagam, Clemens Bergwitz, Bonnie Berger,  
1480 Norbert Perrimon, and Stephanie E. Mohr. 2011. “An Integrative Approach to Ortholog  
1481 Prediction for Disease-Focused and Other Functional Studies.” *BMC Bioinformatics* 12.  
1482 <https://doi.org/10.1186/1471-2105-12-357>.
- 1483 Huang, Sui. 2009. “Non-Genetic Heterogeneity of Cells in Development: More than Just  
1484 Noise.” *Development (Cambridge, England)* 136 (23): 3853–62.  
1485 <https://doi.org/10.1242/dev.035139>.
- 1486 Huang, Wen, Andreas Massouras, Yutaka Inoue, Jason Peiffer, Miquel Ràmia, Aaron M.  
1487 Tarone, Lavanya Turlapati, et al. 2014. “Natural Variation in Genome Architecture among  
1488 205 Drosophila Melanogaster Genetic Reference Panel Lines.” *Genome Research* 24 (7):  
1489 1193–1208. <https://doi.org/10.1101/gr.171546.113>.
- 1490 Junion, Guillaume, Mikhail Spivakov, Charles Girardot, Martina Braun, E Hilary Gustafson,  
1491 Ewan Birney, and Eileen E M Furlong. 2012. “A Transcription Factor Collective Defines  
1492 Cardiac Cell Fate and Reflects Lineage History.”  
1493 <https://doi.org/10.1016/j.cell.2012.01.030>.
- 1494 Kaneko, Kunihiko. 2011. “Proportionality between Variances in Gene Expression Induced by  
1495 Noise and Mutation: Consequence of Evolutionary Robustness.” *BMC Evolutionary  
1496 Biology* 11 (1): 27. <https://doi.org/10.1186/1471-2148-11-27>.
- 1497 Kedlian, Veronika R, Handan Melike Donertas, and Janet M Thornton. 2019. “The Variability  
1498 of Expression of Many Genes and Most Functional Pathways Is Observed to Increase with  
1499 Age in Brain Transcriptome Data.” <https://doi.org/10.1101/526491>.
- 1500 Kent, W. J., C. W. Sugnet, T. S. Furey, K. M. Roskin, T. H. Pringle, A. M. Zahler, and a. D.  
1501 Haussler. 2002. “The Human Genome Browser at UCSC.” *Genome Research* 12 (6): 996–  
1502 1006. <https://doi.org/10.1101/gr.229102>.
- 1503 Khan, Aziz, Oriol Fornes, Arnaud Stigliani, Marius Gheorghe, Jaime A. Castro-Mondragon,  
1504 Robin Van Der Lee, Adrien Bessy, et al. 2018. “JASPAR 2018: Update of the Open-  
1505 Access Database of Transcription Factor Binding Profiles and Its Web Framework.”

- 1506 *Nucleic Acids Research* 46 (D1): D260–66. <https://doi.org/10.1093/nar/gkx1126>.
- 1507 Kozomara, Ana, Maria Birgaoanu, and Sam Griffiths-Jones. 2019. “MiRBase: From  
1508 MicroRNA Sequences to Function.” *Nucleic Acids Research* 47 (D1): D155–62.  
1509 <https://doi.org/10.1093/nar/gky1141>.
- 1510 Kozomara, Ana, and Sam Griffiths-Jones. 2014. “MiRBase: Annotating High Confidence  
1511 MicroRNAs Using Deep Sequencing Data.” *Nucleic Acids Research* 42 (D1): 68–73.  
1512 <https://doi.org/10.1093/nar/gkt1181>.
- 1513 Kudron, Michelle M., Alec Victorsen, Louis Gevirtzman, LaDeana W. Hillier, William W.  
1514 Fisher, Dionne Vafeados, Matt Kirkey, et al. 2018. “The ModERN Resource: Genome-  
1515 Wide Binding Profiles for Hundreds of *Drosophila* and *Caenorhabditis Elegans*  
1516 Transcription Factors.” *Genetics* 208 (3): 937–49.  
1517 <https://doi.org/10.1534/genetics.117.300657>.
- 1518 Kursa, Miron B, and Witold R Rudnicki. 2010. “Feature Selection with the Boruta Package.”  
1519 *JSS Journal of Statistical Software*. Vol. 36. <http://www.jstatsoft.org/>.
- 1520 Kvon, Evgeny Z, Tomas Kazmar, Gerald Stampfel, J Omar Yáñez-Cuna, Michaela Pagani,  
1521 Katharina Schernhuber, Barry J Dickson, and Alexander Stark. 2014. “Genome-Scale  
1522 Functional Characterization of *Drosophila* Developmental Enhancers in Vivo.” *Nature*  
1523 512. <https://doi.org/10.1038/nature13395>.
- 1524 Larsson, Anton J. M., Per Johnsson, Michael Hagemann-Jensen, Leonard Hartmanis, Omid R.  
1525 Faridani, Björn Reinius, Åsa Segerstolpe, Chloe M. Rivera, Bing Ren, and Rickard  
1526 Sandberg. 2019. “Genomic Encoding of Transcriptional Burst Kinetics.” *Nature* 565  
1527 (7738): 251–54. <https://doi.org/10.1038/s41586-018-0836-1>.
- 1528 Lawrence, Michael, Wolfgang Huber, Hervé Pagès, Patrick Aboyoun, Marc Carlson, Robert  
1529 Gentleman, Martin T. Morgan, and Vincent J. Carey. 2013. “Software for Computing and  
1530 Annotating Genomic Ranges.” Edited by Andreas Prlic. *PLoS Computational Biology* 9  
1531 (8): e1003118. <https://doi.org/10.1371/journal.pcbi.1003118>.
- 1532 Lehner, Ben. 2008. “Selection to Minimise Noise in Living Systems and Its Implications for  
1533 the Evolution of Gene Expression.” *Molecular Systems Biology* 4: 170.  
1534 <https://doi.org/10.1038/msb.2008.11>.
- 1535 Lenhard, Boris, Albin Sandelin, and Piero Carninci. 2012. “Metazoan Promoters: Emerging  
1536 Characteristics and Insights into Transcriptional Regulation.” *Nature Reviews Genetics*  
1537 13 (4): 233–45. <https://doi.org/10.1038/nrg3163>.
- 1538 Li, H., B. Handsaker, A. Wysoker, T. Fennell, J. Ruan, N. Homer, G. Marth, G. Abecasis, and  
1539 R. Durbin. 2009. “The Sequence Alignment/Map Format and SAMtools.” *Bioinformatics*  
1540 25 (16): 2078–79. <https://doi.org/10.1093/bioinformatics/btp352>.
- 1541 Li, Heng, and Richard Durbin. 2010. “Fast and Accurate Long-Read Alignment with Burrows-  
1542 Wheeler Transform.” *Bioinformatics* 26 (5): 589–95.  
1543 <https://doi.org/10.1093/bioinformatics/btp698>.
- 1544 Lippert, Christoph, Francesco Paolo Casale, Barbara Rakitsch, and Oliver Stegle. 2014.  
1545 “LIMIX: Genetic Analysis of Multiple Traits.” *BioRxiv*, May, 003905.  
1546 <https://doi.org/10.1101/003905>.
- 1547 Liu, Jialin, Michael Frochoux, Vincent Gardeux, Bart Deplancke, and Marc Robinson-  
1548 Rechavi. 2019. “Selection against Expression Noise Explains the Origin of the Hourglass  
1549 Pattern of Evo-Devo.” *BioRxiv*, 700997. <https://doi.org/10.1101/700997>.

- 1550 Lizio, Marina, Jayson Harshbarger, Hisashi Shimoji, Jessica Severin, Takeya Kasukawa,  
1551 Serkan Sahin, Imad Abugessaisa, et al. 2015. “Gateways to the FANTOM5 Promoter  
1552 Level Mammalian Expression Atlas.” *Genome Biology* 16 (1): 1–14.  
1553 <https://doi.org/10.1186/s13059-014-0560-6>.
- 1554 Love, M. I., Simon Anders, and Wolfgang Huber. 2014. *Differential Analysis of Count Data -*  
1555 *the DESeq2 Package*. *Genome Biology*. Vol. 15. <https://doi.org/110.1186/s13059-014->  
1556 0550-8.
- 1557 Mackay, Trudy F. C., Stephen Richards, Eric A. Stone, Antonio Barbadilla, Julien F. Ayroles,  
1558 Dianhui Zhu, Sònia Casillas, et al. 2012. “The *Drosophila Melanogaster* Genetic  
1559 Reference Panel.” *Nature* 482 (7384): 173–78. <https://doi.org/10.1038/nature10811>.
- 1560 Macneil, Lesley T, and Albertha J M Walhout. 2011. “Gene Regulatory Networks and the Role  
1561 of Robustness and Stochasticity in the Control of Gene Expression.”  
1562 <https://doi.org/10.1101/gr.097378.109>.
- 1563 Metzger, Brian P. H., David C. Yuan, Jonathan D. Gruber, Fabien Duveau, and Patricia J.  
1564 Wittkopp. 2015. “Selection on Noise Constrains Variation in a Eukaryotic Promoter.”  
1565 *Nature* 521 (7552): 344–47. <https://doi.org/10.1038/nature14244>.
- 1566 Morgan, Michael D., and John C. Marioni. 2018. “CpG Island Composition Differences Are a  
1567 Source of Gene Expression Noise Indicative of Promoter Responsiveness.” *Genome*  
1568 *Biology* 19 (1): 81. <https://doi.org/10.1186/s13059-018-1461-x>.
- 1569 Moskalev, Alexey, Svetlana Zhikrivetskaya, George Krasnov, Mikhail Shaposhnikov,  
1570 Ekaterina Proshkina, Dmitry Borisoglebsky, Anton Danilov, et al. 2015. “A Comparison  
1571 of the Transcriptome of *Drosophila Melanogaster* in Response to Entomopathogenic  
1572 Fungus, Ionizing Radiation, Starvation and Cold Shock.” *BMC Genomics* 16 Suppl 1  
1573 (Suppl 13): S8. <https://doi.org/10.1186/1471-2164-16-S13-S8>.
- 1574 Nelson, Matthew R, Daniel Wegmann, Margaret G Ehm, Darren Kessner, Pamela St, Claudio  
1575 Verzilli, Judong Shen, et al. 2015. “An Abundance of Rare Functional Variants in 202  
1576 Drug Target Genes Sequenced in 14,002 People.” *Science* 337 (6090): 100–104.  
1577 <https://doi.org/10.1126/science.1217876.An>.
- 1578 Ohler, Uwe. 2006. “Identification of Core Promoter Modules in *Drosophila* and Their  
1579 Application in Accurate Transcription Start Site Prediction.” *Nucleic Acids Research* 34  
1580 (20): 5943–50. <https://doi.org/10.1093/nar/gkl608>.
- 1581 Ohler, Uwe, Guo-chun Liao, Heinrich Niemann, and Gerald M Rubin. 2002. “Computational  
1582 Analysis of Core Promoters in the *Drosophila* Genome.” *Genome Biology* 3 (12):  
1583 RESEARCH0087. <https://doi.org/10.1186/GB-2002-3-12-RESEARCH0087>.
- 1584 Perry, Michael W, Alistair N Boettiger, Jacques P Bothma, and Michael Levine. 2010.  
1585 “Shadow Enhancers Foster Robustness of *Drosophila* Gastrulation.” *Current Biology* :  
1586 *CB* 20 (17): 1562–67. <https://doi.org/10.1016/j.cub.2010.07.043>.
- 1587 Quinlan, Aaron R., and Ira M. Hall. 2010. “BEDTools: A Flexible Suite of Utilities for  
1588 Comparing Genomic Features.” *Bioinformatics* 26 (6): 841–42.  
1589 <https://doi.org/10.1093/bioinformatics/btq033>.
- 1590 R Development Core Team. 2013. “A Language and Environment for Statistical Computing.”  
1591 *R Foundation for Statistical Computing*. <http://www.r-project.org>.
- 1592 Rach, Elizabeth A, Hsiang-Yu Yuan, William H Majoros, Pavel Tomancak, and Uwe Ohler.  
1593 2009. “Motif Composition, Conservation and Condition-Specificity of Single and



- 1594 Alternative Transcription Start Sites in the Drosophila Genome.” *Genome Biology* 10 (7).  
1595 <https://doi.org/10.1186/gb-2009-10-7-r73>.
- 1596 Raj, Arjun, and Alexander van Oudenaarden. 2008. “Nature, Nurture, or Chance: Stochastic  
1597 Gene Expression and Its Consequences.” *Cell* 135 (2): 216–26.  
1598 <https://doi.org/10.1016/j.cell.2008.09.050>.
- 1599 Ramírez, Fidel, Vivek Bhardwaj, Laura Arrigoni, Kin Chung Lam, Björn A Grüning, José  
1600 Villaveces, Bianca Habermann, Asifa Akhtar, and Thomas Manke. 2018. “High-  
1601 Resolution TADs Reveal DNA Sequences Underlying Genome Organization in Flies.”  
1602 <https://doi.org/10.1038/s41467-017-02525-w>.
- 1603 Ran, Di, and Z John Daye. 2017. “Gene Expression Variability and the Analysis of Large-  
1604 Scale RNA-Seq Studies with the MDSeq.” *Nucleic Acids Research* 45 (13): e127.  
1605 <https://doi.org/10.1093/nar/gkx456>.
- 1606 Raser, J M, and E K O’Shea. 2005. “Noise in Gene Expression: Orgins, Consequences, and  
1607 Control.” *Science* 309 (5743): 2010–13. <https://doi.org/10.1126/science.1105891>.
- 1608 Ravarani, Charles N J, Guilhem Chalancon, Michal Breker, Natalia Sanchez De Groot, and M  
1609 Madan Babu. 2015. “Affinity and Competition for TBP Are Molecular Determinants of  
1610 Gene Expression Noise.” <https://doi.org/10.1038/ncomms10417>.
- 1611 Ray, Debashish, Hilal Kazan, Kate B. Cook, Matthew T. Weirauch, Hamed S. Najafabadi,  
1612 Xiao Li, Serge Gueroussov, et al. 2013. “A Compendium of RNA-Binding Motifs for  
1613 Decoding Gene Regulation.” *Nature* 499 (7457): 172–77.  
1614 <https://doi.org/10.1038/nature12311>.
- 1615 Richard, Angélique, Loïs Boullu, Ulysse Herbach, Arnaud Bonnafoux, Valérie Morin, Elodie  
1616 Vallin, Anissa Guillemain, et al. 2016. “Single-Cell-Based Analysis Highlights a Surge in  
1617 Cell-to-Cell Molecular Variability Preceding Irreversible Commitment in a  
1618 Differentiation Process.” Edited by Sarah A. Teichmann. *PLOS Biology* 14 (12):  
1619 e1002585. <https://doi.org/10.1371/journal.pbio.1002585>.
- 1620 Saunders, Abbie, Leighton J Core, Catherine Sutcliffe, John T Lis, and Hilary L Ashe. 2013.  
1621 “Extensive Polymerase Pausing during Drosophila Axis Patterning Enables High-Level  
1622 and Pliable Transcription.” <https://doi.org/10.1101/gad.215459.113>.
- 1623 Schmiedel, Jörn M, Sandy L Klemm, Yannan Zheng, Apratim Sahay, Nils Blüthgen, Debora  
1624 S Marks, and Alexander van Oudenaarden. 2015. “Gene Expression. MicroRNA Control  
1625 of Protein Expression Noise.” *Science (New York, N.Y.)* 348 (6230): 128–32.  
1626 <https://doi.org/10.1126/science.aaa1738>.
- 1627 Schmiedel, Jörn M, Debora S Marks, Ben Lehner, and Nils Blüthgen. 2018. “Noise Control Is  
1628 a Primary Function of MicroRNAs and Post-Transcriptional Regulation.”  
1629 <https://doi.org/10.1101/168641>.
- 1630 Schor, Ignacio E, Jacob F Degner, Dermot Harnett, Enrico Cannavò, Francesco P Casale,  
1631 Heejung Shim, David A Garfield, et al. 2017. “Promoter Shape Varies across Populations  
1632 and Affects Promoter Evolution and Expression Noise.” *Nature Publishing Group* 49.  
1633 <https://doi.org/10.1038/ng.3791>.
- 1634 Tomancak, Pavel, Amy Beaton, Richard Weiszmann, Elaine Kwan, Sheng Qiang Shu, Suzanna  
1635 E. Lewis, Stephen Richards, et al. 2002. “Systematic Determination of Patterns of Gene  
1636 Expression during Drosophila Embryogenesis.” *Genome Biology* 3 (12): 1–14.  
1637 <https://doi.org/10.1186/gb-2002-3-12-research0088>.

- 1638 Viñuela, Ana, Andrew A Brown, Alfonso Buil, Pei-Chien Tsai, Matthew N Davies, Jordana T  
1639 Bell, Emmanouil T Dermitzakis, Timothy D Spector, and Kerrin S Small. 2018. “Age-  
1640 Dependent Changes in Mean and Variance of Gene Expression across Tissues in a Twin  
1641 Cohort.” *Human Molecular Genetics* 27 (4): 732–41.  
1642 <https://doi.org/10.1093/hmg/ddx424>.
- 1643 Vorontsov, Ilya E., Alla D. Fedorova, Ivan S. Yevshin, Ruslan N. Sharipov, Fedor A.  
1644 Kolpakov, Vsevolod J. Makeev, and Ivan V. Kulakovskiy. 2018. “Genome-Wide Map of  
1645 Human and Mouse Transcription Factor Binding Sites Aggregated from ChIP-Seq Data.”  
1646 *BMC Research Notes* 11 (1): 10–12. <https://doi.org/10.1186/s13104-018-3856-x>.
- 1647 Waddington, CH H. 1942. “Canalization of Development and the Inheritance of Acquired  
1648 Characters.” *Nature* 150 (3811): 563–65. <https://doi.org/10.1038/150563a0>.
- 1649 Weirauch, Matthew T, Ally Yang, Mihai Albu, Atina Cote, Alejandro Montenegro-, Philipp  
1650 Drewe, Hamed S Najafabadi, et al. 2015. “Determination and Inference of Eukaryotic  
1651 Transcription Factor Sequence Specificity” 158 (6): 1431–43.  
1652 <https://doi.org/10.1016/j.cell.2014.08.009>.Determination.
- 1653 Wishart, David S., Yannick D. Feunang, An C. Guo, Elvis J. Lo, Ana Marcu, Jason R. Grant,  
1654 Tanvir Sajed, et al. 2018. “DrugBank 5.0: A Major Update to the DrugBank Database for  
1655 2018.” *Nucleic Acids Research* 46 (D1): D1074–82. <https://doi.org/10.1093/nar/gkx1037>.
- 1656 Wright, Marvin N, and Andreas Ziegler. 2015. “Ranger: A Fast Implementation of Random  
1657 Forests for High Dimensional Data in C++ and R.” <https://arxiv.org/pdf/1508.04409.pdf>.
- 1658 Yu, Guangchuang, Li Gen Wang, Yanyan Han, and Qing Yu He. 2012. “ClusterProfiler: An R  
1659 Package for Comparing Biological Themes among Gene Clusters.” *OMICS A Journal of*  
1660 *Integrative Biology* 16 (5): 284–87. <https://doi.org/10.1089/omi.2011.0118>.
- 1661 Zhang, Fuquan, Yin Yao Shugart, Weihua Yue, Zaohuo Cheng, Guoqiang Wang, Zhenhe  
1662 Zhou, Chunhui Jin, Jianmin Yuan, Sha Liu, and Yong Xu. 2015. “Increased Variability  
1663 of Genomic Transcription in Schizophrenia.” *Scientific Reports* 5 (December): 17995.  
1664 <https://doi.org/10.1038/srep17995>.
- 1665 Zinzen, Robert P, Charles Girardot, Julien Gagneur, Martina Braun, and Eileen E M Furlong.  
1666 2009. “Combinatorial Binding Predicts Spatio-Temporal Cis-Regulatory Activity.”  
1667 *Nature* 461. <https://doi.org/10.1038/nature08531>.
- 1668
